# Supplementary material for: Current Status and Issues Regarding Pre-processing of fNIRS Neuroimaging Data: An Investigation of Diverse Signal Filtering Methods Within a General Linear Model Framework
Source: Front Hum Neurosci. 2019 Jan 11;12:505. doi: 10.3389/fnhum.2018.00505 (PMC6336925; doi:10.3389/fnhum.2018.00505)
Supplement: Supplementary file 1 [file Table_1.xlsx]

## Sheet: No Correction
Amplitude 1
BP
HbO2C		0.01-0.09		0.01-0.2		0.01-0.3		0.01-0.5			HbRC		0.01-0.09		0.01-0.2		0.01-0.3		0.01-0.5			HbO2OD		0.01-0.09		0.01-0.2		0.01-0.3		0.01-0.5			HbROD		0.01-0.09		0.01-0.2		0.01-0.3		0.01-0.5
		W(18)	p	W(18)	p	W(18)	p	W(18)	p				W(18)	p	W(18)	p	W(18)	p	W(18)	p				W(18)	p	W(18)	p	W(18)	p	W(18)	p				W(18)	p	W(18)	p	W(18)	p	W(18)	p
BW	3	0.927248	0.173676	0.926468	0.168253	0.925495	0.161722	0.923606	0.149745		BW	3	0.959407	0.590226	0.960677	0.614757	0.96056	0.612488	0.960517	0.611644		BW	3	0.927248	0.173676	0.926468	0.168253	0.925495	0.161722	0.923606	0.149745		BW	3	0.959407	0.590226	0.960677	0.614757	0.96056	0.612488	0.960517	0.611644
	4	0.92742	0.174892	0.918995	0.124079	0.921811	0.139179	0.920761	0.13335			4	0.957255	0.549624	0.952574	0.466805	0.955257	0.513277	0.956304	0.532158			4	0.92742	0.174892	0.918995	0.124079	0.921811	0.139179	0.920761	0.13335			4	0.957255	0.549624	0.952574	0.466805	0.955257	0.513277	0.956304	0.532158
	5	-	-	0.933822	0.22657	0.933043	0.219582	0.932119	0.211553			5	-	-	0.956009	0.526783	0.956698	0.539344	0.958412	0.571292			5	-	-	0.933822	0.22657	0.933043	0.219582	0.932119	0.211553			5	-	-	0.956009	0.526783	0.956698	0.539344	0.958412	0.571292
	20	-	-	-	-	-	-	-	-			20	-	-	-	-	-	-	-	-			20	-	-	-	-	-	-	-	-			20	-	-	-	-	-	-	-	-
	100	-	-	-	-	-	-	-	-			100	-	-	-	-	-	-	-	-			100	-	-	-	-	-	-	-	-			100	-	-	-	-	-	-	-	-
	200	-	-	-	-	-	-	-	-			200	-	-	-	-	-	-	-	-			200	-	-	-	-	-	-	-	-			200	-	-	-	-	-	-	-	-
	500	-	-	-	-	-	-	-	-			500	-	-	-	-	-	-	-	-			500	-	-	-	-	-	-	-	-			500	-	-	-	-	-	-	-	-
	1000	-	-	-	-	-	-	-	-			1000	-	-	-	-	-	-	-	-			1000	-	-	-	-	-	-	-	-			1000	-	-	-	-	-	-	-	-
FIR	3	0.747955	0.000601731	0.747955	0.000601736	0.747956	0.000601745	0.747958	0.000601774		FIR	3	0.781674	0.00143024	0.781674	0.00143023	0.781673	0.0014302	0.781671	0.00143013		FIR	3	0.747955	0.000601731	0.747955	0.000601736	0.747956	0.000601745	0.747958	0.000601774		FIR	3	0.781674	0.00143024	0.781674	0.00143023	0.781673	0.0014302	0.781671	0.00143013
	4	0.747912	0.000601092	0.747913	0.00060111	0.747915	0.000601136	0.747921	0.000601219			4	0.781707	0.00143148	0.781706	0.00143145	0.781705	0.00143141	0.781701	0.00143128			4	0.747912	0.000601092	0.747913	0.00060111	0.747915	0.000601136	0.747921	0.000601219			4	0.781707	0.00143148	0.781706	0.00143145	0.781705	0.00143141	0.781701	0.00143128
	5	0.747861	0.000600329	0.747863	0.000600368	0.747867	0.000600429	0.74788	0.000600615			5	0.781725	0.0014322	0.781725	0.00143217	0.781724	0.00143213	0.78172	0.00143198			5	0.747861	0.000600329	0.747863	0.000600368	0.747867	0.000600429	0.74788	0.000600615			5	0.781725	0.0014322	0.781725	0.00143217	0.781724	0.00143213	0.78172	0.00143198
	20	0.745932	0.00057239	0.746413	0.000579219	0.747042	0.000588292	0.74799	0.000602258			20	0.780282	0.00137826	0.780786	0.00139685	0.781373	0.00141881	0.78203	0.00144386			20	0.745932	0.00057239	0.746413	0.000579219	0.747042	0.000588292	0.74799	0.000602258			20	0.780282	0.00137826	0.780786	0.00139685	0.781373	0.00141881	0.78203	0.00144386
	100	0.7506	0.000642574	0.761352	0.000842411	0.761468	0.000844888	0.761309	0.000841486			100	0.789156	0.0017487	0.800428	0.00238306	0.800077	0.00235988	0.799262	0.00230708			100	0.7506	0.000642574	0.761352	0.000842411	0.761468	0.000844888	0.761309	0.000841486			100	0.789156	0.0017487	0.800428	0.00238306	0.800077	0.00235988	0.799262	0.00230708
	200	0.826946	0.00510574	0.824487	0.00474743	0.823959	0.00467406	0.823579	0.00462198			200	0.920211	0.117004	0.920177	0.116857	0.919552	0.114151	0.918276	0.108833			200	0.826946	0.00510574	0.824487	0.00474743	0.823959	0.00467406	0.823579	0.00462198			200	0.920211	0.117004	0.920177	0.116857	0.919552	0.114151	0.918276	0.108833
	500	0.91782	0.118277	0.917977	0.119037	0.918125	0.119757	0.918418	0.121196			500	0.922956	0.145834	0.925205	0.159825	0.925635	0.162644	0.92591	0.164478			500	0.91782	0.118277	0.917977	0.119037	0.918125	0.119757	0.918418	0.121196			500	0.922956	0.145834	0.925205	0.159825	0.925635	0.162644	0.92591	0.164478
	1000	0.92079	0.133506	0.919681	0.127603	0.919316	0.125716	0.919331	0.125792			1000	0.971887	0.832334	0.972031	0.834897	0.971707	0.829106	0.971349	0.822652			1000	0.92079	0.133506	0.919681	0.127603	0.919316	0.125716	0.919331	0.125792			1000	0.971887	0.832334	0.972031	0.834897	0.971707	0.829106	0.971349	0.822652
LP
HbO2C		0.09		0.1		0.14		0.5			HbRC		0.09		0.1		0.14		0.5			HbO2OD		0.09		0.1		0.14		0.5			HbROD		0.09		0.1		0.14		0.5
		W(18)	p	W(18)	p	W(18)	p	W(18)	p				W(18)	p	W(18)	p	W(18)	p	W(18)	p				W(18)	p	W(18)	p	W(18)	p	W(18)	p				W(18)	p	W(18)	p	W(18)	p	W(18)	p
BW	3	0.748843	0.000615115	0.748927	0.0006164	0.748227	0.000605798	0.748012	0.000602577		BW	3	0.78178	0.00143427	0.782155	0.0014487	0.782734	0.00147124	0.781888	0.00143841		BW	3	0.748843	0.000615115	0.748927	0.0006164	0.748227	0.000605798	0.748012	0.000602577		BW	3	0.78178	0.00143427	0.782155	0.0014487	0.782734	0.00147124	0.781888	0.00143841
	4	0.749846	0.000630642	0.749704	0.000628412	0.748181	0.000605114	0.748009	0.000602535			4	0.781519	0.00142436	0.781915	0.00143947	0.782702	0.00147	0.781878	0.00143804			4	0.749846	0.000630642	0.749704	0.000628412	0.748181	0.000605114	0.748009	0.000602535			4	0.781519	0.00142436	0.781915	0.00143947	0.782702	0.00147	0.781878	0.00143804
	5	0.750973	0.000648568	0.750559	0.000641926	0.748234	0.0006059	0.748008	0.000602517			5	0.781447	0.00142161	0.781829	0.00143615	0.782813	0.00147436	0.781878	0.00143803			5	0.750973	0.000648568	0.750559	0.000641926	0.748234	0.0006059	0.748008	0.000602517			5	0.781447	0.00142161	0.781829	0.00143615	0.782813	0.00147436	0.781878	0.00143803
	20	-	-	-	-	-	-	0.748006	0.000602486			20	-	-	-	-	-	-	0.781881	0.00143816			20	-	-	-	-	-	-	0.748006	0.000602486			20	-	-	-	-	-	-	0.781881	0.00143816
	100	-	-	-	-	-	-	-	-			100	-	-	-	-	-	-	-	-			100	-	-	-	-	-	-	-	-			100	-	-	-	-	-	-	-	-
	200	-	-	-	-	-	-	-	-			200	-	-	-	-	-	-	-	-			200	-	-	-	-	-	-	-	-			200	-	-	-	-	-	-	-	-
	500	-	-	-	-	-	-	-	-			500	-	-	-	-	-	-	-	-			500	-	-	-	-	-	-	-	-			500	-	-	-	-	-	-	-	-
	1000	-	-	-	-	-	-	-	-			1000	-	-	-	-	-	-	-	-			1000	-	-	-	-	-	-	-	-			1000	-	-	-	-	-	-	-	-
FIR	3	0.747955	0.00060173	0.747955	0.000601731	0.747955	0.000601732	0.747958	0.000601773		FIR	3	0.781674	0.00143024	0.781674	0.00143024	0.781674	0.00143024	0.781671	0.00143013		FIR	3	0.747955	0.00060173	0.747955	0.000601731	0.747955	0.000601732	0.747958	0.000601773		FIR	3	0.781674	0.00143024	0.781674	0.00143024	0.781674	0.00143024	0.781671	0.00143013
	4	0.747912	0.000601092	0.747912	0.000601093	0.747912	0.000601098	0.74792	0.000601216			4	0.781707	0.00143148	0.781707	0.00143148	0.781706	0.00143147	0.781701	0.00143128			4	0.747912	0.000601092	0.747912	0.000601093	0.747912	0.000601098	0.74792	0.000601216			4	0.781707	0.00143148	0.781707	0.00143148	0.781706	0.00143147	0.781701	0.00143128
	5	0.747861	0.000600327	0.747861	0.00060033	0.747862	0.000600341	0.74788	0.000600609			5	0.781725	0.0014322	0.781725	0.0014322	0.781725	0.00143219	0.78172	0.00143198			5	0.747861	0.000600327	0.747861	0.00060033	0.747862	0.000600341	0.74788	0.000600609			5	0.781725	0.0014322	0.781725	0.0014322	0.781725	0.00143219	0.78172	0.00143198
	20	0.745916	0.000572164	0.745945	0.000572571	0.746088	0.000574593	0.747899	0.000600891			20	0.780265	0.00137765	0.780296	0.00137875	0.780447	0.00138432	0.78196	0.00144118			20	0.745916	0.000572164	0.745945	0.000572571	0.746088	0.000574593	0.747899	0.000600891			20	0.780265	0.00137765	0.780296	0.00137875	0.780447	0.00138432	0.78196	0.00144118
	100	0.740125	0.000496452	0.743986	0.000545631	0.748198	0.000605357	0.748334	0.000607402			100	0.774212	0.00117433	0.779571	0.00135249	0.7833	0.00149366	0.782413	0.00145869			100	0.740125	0.000496452	0.743986	0.000545631	0.748198	0.000605357	0.748334	0.000607402			100	0.774212	0.00117433	0.779571	0.00135249	0.7833	0.00149366	0.782413	0.00145869
	200	0.74791	0.000601056	0.749874	0.00063108	0.74858	0.000611128	0.748391	0.000608267			200	0.784711	0.0015512	0.785676	0.00159192	0.783841	0.00151545	0.782457	0.00146041			200	0.74791	0.000601056	0.749874	0.00063108	0.74858	0.000611128	0.748391	0.000608267			200	0.784711	0.0015512	0.785676	0.00159192	0.783841	0.00151545	0.782457	0.00146041
	500	0.74895	0.000616758	0.749974	0.000632648	0.747796	0.000599361	0.748084	0.000603653			500	0.784122	0.00152691	0.78426	0.00153254	0.783331	0.00149491	0.781925	0.00143982			500	0.74895	0.000616758	0.749974	0.000632648	0.747796	0.000599361	0.748084	0.000603653			500	0.784122	0.00152691	0.78426	0.00153254	0.783331	0.00149491	0.781925	0.00143982
	1000	0.749825	0.000630305	0.7501	0.000634631	0.747787	0.000599232	0.748082	0.000603621			1000	0.784868	0.00155777	0.784047	0.00152382	0.783276	0.00149272	0.78193	0.00144001			1000	0.749825	0.000630305	0.7501	0.000634631	0.747787	0.000599232	0.748082	0.000603621			1000	0.784868	0.00155777	0.784047	0.00152382	0.783276	0.00149272	0.78193	0.00144001
MovAvg	-	0.747752	0.000598712	0.747852	0.000600192	0.747925	0.000601284	-	-		MovAvg	-	0.78174	0.00143274	0.78174	0.00143275	0.781708	0.00143152	-	-		MovAvg	-	0.747752	0.000598712	0.747852	0.000600192	0.747925	0.000601284	-	-		MovAvg	-	0.78174	0.00143274	0.78174	0.00143275	0.781708	0.00143152	-	-
Amplitude 2
BP
HbO2C		0.01-0.09		0.01-0.2		0.01-0.3		0.01-0.5			HbRC		0.01-0.09		0.01-0.2		0.01-0.3		0.01-0.5			HbO2OD		0.01-0.09		0.01-0.2		0.01-0.3		0.01-0.5			HbROD		0.01-0.09		0.01-0.2		0.01-0.3		0.01-0.5
		W(18)	p	W(18)	p	W(18)	p	W(18)	p				W(18)	p	W(18)	p	W(18)	p	W(18)	p				W(18)	p	W(18)	p	W(18)	p	W(18)	p				W(18)	p	W(18)	p	W(18)	p	W(18)	p
BW	3	0.931824	0.209051	0.940935	0.300638	0.938918	0.277667	0.937507	0.262548		BW	3	0.939789	0.287381	0.93971	0.286491	0.940665	0.297463	0.940376	0.294105		BW	3	0.931824	0.209051	0.940935	0.300638	0.938918	0.277667	0.937507	0.262548		BW	3	0.939789	0.287381	0.93971	0.286491	0.940665	0.297463	0.940376	0.294105
	4	0.935426	0.241635	0.939917	0.288839	0.935301	0.240428	0.934365	0.231566			4	0.938825	0.276651	0.933495	0.223613	0.936932	0.256614	0.939382	0.282802			4	0.935426	0.241635	0.939917	0.288839	0.935301	0.240428	0.934365	0.231566			4	0.938825	0.276651	0.933495	0.223613	0.936932	0.256614	0.939382	0.282802
	5	-	-	0.932105	0.211437	0.926556	0.168856	0.928748	0.184581			5	-	-	0.93308	0.219911	0.933163	0.220643	0.936309	0.250312			5	-	-	0.932105	0.211437	0.926556	0.168856	0.928748	0.184581			5	-	-	0.93308	0.219911	0.933163	0.220643	0.936309	0.250312
	20	-	-	-	-	-	-	-	-			20	-	-	-	-	-	-	-	-			20	-	-	-	-	-	-	-	-			20	-	-	-	-	-	-	-	-
	100	-	-	-	-	-	-	-	-			100	-	-	-	-	-	-	-	-			100	-	-	-	-	-	-	-	-			100	-	-	-	-	-	-	-	-
	200	-	-	-	-	-	-	-	-			200	-	-	-	-	-	-	-	-			200	-	-	-	-	-	-	-	-			200	-	-	-	-	-	-	-	-
	500	-	-	-	-	-	-	-	-			500	-	-	-	-	-	-	-	-			500	-	-	-	-	-	-	-	-			500	-	-	-	-	-	-	-	-
	1000	-	-	-	-	-	-	-	-			1000	-	-	-	-	-	-	-	-			1000	-	-	-	-	-	-	-	-			1000	-	-	-	-	-	-	-	-
FIR	3	0.751036	0.000649597	0.751036	0.0006496	0.751037	0.000649605	0.751038	0.000649619		FIR	3	0.813262	0.0034246	0.813261	0.00342457	0.813261	0.00342452	0.813259	0.00342437		FIR	3	0.751036	0.000649597	0.751036	0.0006496	0.751037	0.000649605	0.751038	0.000649619		FIR	3	0.813262	0.0034246	0.813261	0.00342457	0.813261	0.00342452	0.813259	0.00342437
	4	0.751013	0.000649222	0.751014	0.000649233	0.751015	0.00064925	0.751018	0.000649302			4	0.81329	0.00342736	0.813289	0.0034273	0.813288	0.0034272	0.813285	0.00342689			4	0.751013	0.000649222	0.751014	0.000649233	0.751015	0.00064925	0.751018	0.000649302			4	0.81329	0.00342736	0.813289	0.0034273	0.813288	0.0034272	0.813285	0.00342689
	5	0.750979	0.000648674	0.750981	0.000648704	0.750984	0.000648749	0.750992	0.000648885			5	0.813308	0.00342919	0.813308	0.00342911	0.813306	0.003429	0.813302	0.0034286			5	0.750979	0.000648674	0.750981	0.000648704	0.750984	0.000648749	0.750992	0.000648885			5	0.813308	0.00342919	0.813308	0.00342911	0.813306	0.003429	0.813302	0.0034286
	20	0.749392	0.000623564	0.749791	0.000629767	0.75031	0.000637952	0.751117	0.000650906			20	0.811752	0.00327967	0.812263	0.00332793	0.81289	0.00338827	0.813647	0.00346267			20	0.749392	0.000623564	0.749791	0.000629767	0.75031	0.000637952	0.751117	0.000650906			20	0.811752	0.00327967	0.812263	0.00332793	0.81289	0.00338827	0.813647	0.00346267
	100	0.753036	0.000682856	0.761706	0.000850039	0.761846	0.000853066	0.761605	0.000847853			100	0.819418	0.00409175	0.831461	0.00584246	0.83057	0.00568838	0.829612	0.00552763			100	0.753036	0.000682856	0.761706	0.000850039	0.761846	0.000853066	0.761605	0.000847853			100	0.819418	0.00409175	0.831461	0.00584246	0.83057	0.00568838	0.829612	0.00552763
	200	0.824259	0.00471555	0.820984	0.00428322	0.820243	0.00419147	0.819714	0.00412719			200	0.936124	0.213587	0.937385	0.224062	0.935849	0.211365	0.934415	0.200158			200	0.824259	0.00471555	0.820984	0.00428322	0.820243	0.00419147	0.819714	0.00412719			200	0.936124	0.213587	0.937385	0.224062	0.935849	0.211365	0.934415	0.200158
	500	0.920004	0.129296	0.921745	0.138806	0.921409	0.13692	0.921256	0.136067			500	0.943203	0.328452	0.948823	0.40686	0.950613	0.434716	0.951372	0.446951			500	0.920004	0.129296	0.921745	0.138806	0.921409	0.13692	0.921256	0.136067			500	0.943203	0.328452	0.948823	0.40686	0.950613	0.434716	0.951372	0.446951
	1000	0.944729	0.34839	0.946231	0.36898	0.946317	0.370194	0.946517	0.373016			1000	0.965631	0.712689	0.965347	0.707056	0.965602	0.71212	0.965857	0.717182			1000	0.944729	0.34839	0.946231	0.36898	0.946317	0.370194	0.946517	0.373016			1000	0.965631	0.712689	0.965347	0.707056	0.965602	0.71212	0.965857	0.717182
LP
HbO2C		0.09		0.1		0.14		0.5			HbRC		0.09		0.1		0.14		0.5			HbO2OD		0.09		0.1		0.14		0.5			HbROD		0.09		0.1		0.14		0.5
		W(18)	p	W(18)	p	W(18)	p	W(18)	p				W(18)	p	W(18)	p	W(18)	p	W(18)	p				W(18)	p	W(18)	p	W(18)	p	W(18)	p				W(18)	p	W(18)	p	W(18)	p	W(18)	p
BW	3	0.751814	0.000662327	0.751899	0.000663723	0.751271	0.000653404	0.751119	0.000650935		BW	3	0.81315	0.0034136	0.8136	0.00345799	0.814285	0.00352678	0.813481	0.00344617		BW	3	0.751814	0.000662327	0.751899	0.000663723	0.751271	0.000653404	0.751119	0.000650935		BW	3	0.81315	0.0034136	0.8136	0.00345799	0.814285	0.00352678	0.813481	0.00344617
	4	0.752736	0.000677751	0.752601	0.000675466	0.75119	0.000652093	0.751114	0.000650861			4	0.813184	0.00341693	0.813617	0.00345971	0.814323	0.00353068	0.81347	0.0034451			4	0.752736	0.000677751	0.752601	0.000675466	0.75119	0.000652093	0.751114	0.000650861			4	0.813184	0.00341693	0.813617	0.00345971	0.814323	0.00353068	0.81347	0.0034451
	5	0.753778	0.000695668	0.75341	0.000689295	0.751238	0.000652875	0.751111	0.000650804			5	0.81332	0.00343029	0.813708	0.00346876	0.814448	0.00354341	0.813463	0.00344443			5	0.753778	0.000695668	0.75341	0.000689295	0.751238	0.000652875	0.751111	0.000650804			5	0.81332	0.00343029	0.813708	0.00346876	0.814448	0.00354341	0.813463	0.00344443
	20	-	-	-	-	-	-	0.7511	0.000650632			20	-	-	-	-	-	-	0.813458	0.00344399			20	-	-	-	-	-	-	0.7511	0.000650632			20	-	-	-	-	-	-	0.813458	0.00344399
	100	-	-	-	-	-	-	-	-			100	-	-	-	-	-	-	-	-			100	-	-	-	-	-	-	-	-			100	-	-	-	-	-	-	-	-
	200	-	-	-	-	-	-	-	-			200	-	-	-	-	-	-	-	-			200	-	-	-	-	-	-	-	-			200	-	-	-	-	-	-	-	-
	500	-	-	-	-	-	-	-	-			500	-	-	-	-	-	-	-	-			500	-	-	-	-	-	-	-	-			500	-	-	-	-	-	-	-	-
	1000	-	-	-	-	-	-	-	-			1000	-	-	-	-	-	-	-	-			1000	-	-	-	-	-	-	-	-			1000	-	-	-	-	-	-	-	-
FIR	3	0.751036	0.000649597	0.751036	0.000649597	0.751036	0.000649598	0.751038	0.000649619		FIR	3	0.813262	0.0034246	0.813262	0.0034246	0.813262	0.00342459	0.813259	0.00342437		FIR	3	0.751036	0.000649597	0.751036	0.000649597	0.751036	0.000649598	0.751038	0.000649619		FIR	3	0.813262	0.0034246	0.813262	0.0034246	0.813262	0.00342459	0.813259	0.00342437
	4	0.751013	0.000649221	0.751013	0.000649222	0.751013	0.000649225	0.751018	0.0006493			4	0.81329	0.00342736	0.81329	0.00342736	0.81329	0.00342734	0.813285	0.0034269			4	0.751013	0.000649221	0.751013	0.000649222	0.751013	0.000649225	0.751018	0.0006493			4	0.81329	0.00342736	0.81329	0.00342736	0.81329	0.00342734	0.813285	0.0034269
	5	0.750979	0.000648673	0.750979	0.000648675	0.75098	0.000648684	0.750992	0.000648881			5	0.813308	0.00342919	0.813308	0.00342919	0.813308	0.00342916	0.813303	0.00342861			5	0.750979	0.000648673	0.750979	0.000648675	0.75098	0.000648684	0.750992	0.000648881			5	0.813308	0.00342919	0.813308	0.00342919	0.813308	0.00342916	0.813303	0.00342861
	20	0.749379	0.000623359	0.749403	0.000623729	0.749521	0.000625568	0.751038	0.00064963			20	0.811735	0.00327804	0.811766	0.00328097	0.81192	0.00329545	0.813574	0.00345542			20	0.749379	0.000623359	0.749403	0.000623729	0.749521	0.000625568	0.751038	0.00064963			20	0.811735	0.00327804	0.811766	0.00328097	0.81192	0.00329545	0.813574	0.00345542
	100	0.744298	0.000549827	0.747591	0.000596329	0.751224	0.000652638	0.751367	0.000654976			100	0.805801	0.00276992	0.810398	0.00315529	0.814692	0.00356833	0.813973	0.00349526			100	0.744298	0.000549827	0.747591	0.000596329	0.751224	0.000652638	0.751367	0.000654976			100	0.805801	0.00276992	0.810398	0.00315529	0.814692	0.00356833	0.813973	0.00349526
	200	0.750864	0.00064681	0.752673	0.000676696	0.751475	0.000656741	0.751412	0.000655715			200	0.815279	0.00362923	0.816483	0.00375762	0.815393	0.00364115	0.813991	0.00349706			200	0.750864	0.00064681	0.752673	0.000676696	0.751475	0.000656741	0.751412	0.000655715			200	0.815279	0.00362923	0.816483	0.00375762	0.815393	0.00364115	0.813991	0.00349706
	500	0.751854	0.00066299	0.753093	0.000683845	0.750838	0.00064639	0.751193	0.000652138			500	0.814935	0.00359336	0.815599	0.00366285	0.815098	0.00361036	0.813542	0.00345229			500	0.751854	0.00066299	0.753093	0.000683845	0.750838	0.00064639	0.751193	0.000652138			500	0.814935	0.00359336	0.815599	0.00366285	0.815098	0.00361036	0.813542	0.00345229
	1000	0.75277	0.000678337	0.753089	0.000683767	0.75074	0.000644815	0.751165	0.000651687			1000	0.816158	0.00372243	0.815498	0.00365222	0.815119	0.00361255	0.813546	0.0034527			1000	0.75277	0.000678337	0.753089	0.000683767	0.75074	0.000644815	0.751165	0.000651687			1000	0.816158	0.00372243	0.815498	0.00365222	0.815119	0.00361255	0.813546	0.0034527
MovAvg	-	0.7509	0.000647392	0.750975	0.00064861	0.751024	0.000649392	-	-		MovAvg	-	0.813329	0.0034312	0.813322	0.00343049	0.81329	0.00342735	-	-		MovAvg	-	0.7509	0.000647392	0.750975	0.00064861	0.751024	0.000649392	-	-		MovAvg	-	0.813329	0.0034312	0.813322	0.00343049	0.81329	0.00342735	-	-
Amplitude 3
BP
HbO2C		0.01-0.09		0.01-0.2		0.01-0.3		0.01-0.5			HbRC		0.01-0.09		0.01-0.2		0.01-0.3		0.01-0.5			HbO2OD		0.01-0.09		0.01-0.2		0.01-0.3		0.01-0.5			HbROD		0.01-0.09		0.01-0.2		0.01-0.3		0.01-0.5
		W(18)	p	W(18)	p	W(18)	p	W(18)	p				W(18)	p	W(18)	p	W(18)	p	W(18)	p				W(18)	p	W(18)	p	W(18)	p	W(18)	p				W(18)	p	W(18)	p	W(18)	p	W(18)	p
BW	3	0.941976	0.313136	0.952818	0.470922	0.952238	0.461198	0.952038	0.457872		BW	3	0.926342	0.167392	0.925917	0.164524	0.925431	0.161305	0.924667	0.15636		BW	3	0.941976	0.313136	0.952818	0.470922	0.952238	0.461198	0.952038	0.457872		BW	3	0.926342	0.167392	0.925917	0.164524	0.925431	0.161305	0.924667	0.15636
	4	0.948028	0.394926	0.95349	0.482351	0.951457	0.448333	0.95069	0.435938			4	0.931559	0.20683	0.928184	0.180407	0.931608	0.207235	0.930342	0.196899			4	0.948028	0.394926	0.95349	0.482351	0.951457	0.448333	0.95069	0.435938			4	0.931559	0.20683	0.928184	0.180407	0.931608	0.207235	0.930342	0.196899
	5	-	-	0.950873	0.438882	0.948054	0.395307	0.950683	0.435826			5	-	-	0.935449	0.241858	0.92872	0.184369	0.928036	0.179325			5	-	-	0.950873	0.438882	0.948054	0.395307	0.950683	0.435826			5	-	-	0.935449	0.241858	0.92872	0.184369	0.928036	0.179325
	20	-	-	-	-	-	-	-	-			20	-	-	-	-	-	-	-	-			20	-	-	-	-	-	-	-	-			20	-	-	-	-	-	-	-	-
	100	-	-	-	-	-	-	-	-			100	-	-	-	-	-	-	-	-			100	-	-	-	-	-	-	-	-			100	-	-	-	-	-	-	-	-
	200	-	-	-	-	-	-	-	-			200	-	-	-	-	-	-	-	-			200	-	-	-	-	-	-	-	-			200	-	-	-	-	-	-	-	-
	500	-	-	-	-	-	-	-	-			500	-	-	-	-	-	-	-	-			500	-	-	-	-	-	-	-	-			500	-	-	-	-	-	-	-	-
	1000	-	-	-	-	-	-	-	-			1000	-	-	-	-	-	-	-	-			1000	-	-	-	-	-	-	-	-			1000	-	-	-	-	-	-	-	-
FIR	3	0.821289	0.0043216	0.82129	0.00432168	0.821291	0.0043218	0.821294	0.00432218		FIR	3	0.785977	0.00160488	0.785977	0.00160488	0.785977	0.00160487	0.785977	0.00160486		FIR	3	0.821289	0.0043216	0.82129	0.00432168	0.821291	0.0043218	0.821294	0.00432218		FIR	3	0.785977	0.00160488	0.785977	0.00160488	0.785977	0.00160487	0.785977	0.00160486
	4	0.821222	0.00431302	0.821223	0.00431325	0.821226	0.00431361	0.821235	0.00431472			4	0.785982	0.00160508	0.785982	0.00160508	0.785982	0.00160507	0.785982	0.00160506			4	0.821222	0.00431302	0.821223	0.00431325	0.821226	0.00431361	0.821235	0.00431472			4	0.785982	0.00160508	0.785982	0.00160508	0.785982	0.00160507	0.785982	0.00160506
	5	0.821142	0.00430296	0.821146	0.00430348	0.821152	0.00430427	0.821172	0.00430672			5	0.785989	0.0016054	0.785989	0.00160538	0.785988	0.00160534	0.785985	0.00160521			5	0.821142	0.00430296	0.821146	0.00430348	0.821152	0.00430427	0.821172	0.00430672			5	0.785989	0.0016054	0.785989	0.00160538	0.785988	0.00160534	0.785985	0.00160521
	20	0.818502	0.0039841	0.819129	0.00405744	0.819957	0.00415663	0.821299	0.00432285			20	0.785414	0.00158076	0.78562	0.00158954	0.785863	0.00159995	0.78612	0.00161107			20	0.818502	0.0039841	0.819129	0.00405744	0.819957	0.00415663	0.821299	0.00432285			20	0.785414	0.00158076	0.78562	0.00158954	0.785863	0.00159995	0.78612	0.00161107
	100	0.821535	0.00435279	0.835854	0.00667138	0.835938	0.00668831	0.835776	0.00665546			100	0.792137	0.00189635	0.795343	0.00207041	0.795005	0.00205124	0.794443	0.00201986			100	0.821535	0.00435279	0.835854	0.00667138	0.835938	0.00668831	0.835776	0.00665546			100	0.792137	0.00189635	0.795343	0.00207041	0.795005	0.00205124	0.794443	0.00201986
	200	0.897278	0.0505116	0.900444	0.0565764	0.90019	0.0560625	0.899804	0.0552902			200	0.874581	0.0230016	0.872509	0.0214574	0.872074	0.0211474	0.871383	0.0206652			200	0.897278	0.0505116	0.900444	0.0565764	0.90019	0.0560625	0.899804	0.0552902			200	0.874581	0.0230016	0.872509	0.0214574	0.872074	0.0211474	0.871383	0.0206652
	500	0.945963	0.365241	0.948949	0.40877	0.948522	0.402304	0.948373	0.400066			500	0.945673	0.361214	0.949208	0.412726	0.950481	0.432618	0.951381	0.447091			500	0.945963	0.365241	0.948949	0.40877	0.948522	0.402304	0.948373	0.400066			500	0.945673	0.361214	0.949208	0.412726	0.950481	0.432618	0.951381	0.447091
	1000	0.947338	0.384803	0.948845	0.407182	0.948659	0.404371	0.948685	0.40477			1000	0.949211	0.412767	0.950461	0.43229	0.950716	0.436363	0.950931	0.439812			1000	0.947338	0.384803	0.948845	0.407182	0.948659	0.404371	0.948685	0.40477			1000	0.949211	0.412767	0.950461	0.43229	0.950716	0.436363	0.950931	0.439812
LP
HbO2C		0.09		0.1		0.14		0.5			HbRC		0.09		0.1		0.14		0.5			HbO2OD		0.09		0.1		0.14		0.5			HbROD		0.09		0.1		0.14		0.5
		W(18)	p	W(18)	p	W(18)	p	W(18)	p				W(18)	p	W(18)	p	W(18)	p	W(18)	p				W(18)	p	W(18)	p	W(18)	p	W(18)	p				W(18)	p	W(18)	p	W(18)	p	W(18)	p
BW	3	0.820769	0.00425635	0.821297	0.00432253	0.821227	0.0043137	0.821349	0.00432913		BW	3	0.786934	0.00164677	0.786805	0.00164104	0.786631	0.00163337	0.786041	0.00160765		BW	3	0.820769	0.00425635	0.821297	0.00432253	0.821227	0.0043137	0.821349	0.00432913		BW	3	0.786934	0.00164677	0.786805	0.00164104	0.786631	0.00163337	0.786041	0.00160765
	4	0.822056	0.00441972	0.822325	0.00445471	0.821214	0.00431212	0.821348	0.00432905			4	0.786675	0.00163532	0.786524	0.00162868	0.786534	0.0016291	0.786035	0.00160736			4	0.822056	0.00441972	0.822325	0.00445471	0.821214	0.00431212	0.821348	0.00432905			4	0.786675	0.00163532	0.786524	0.00162868	0.786534	0.0016291	0.786035	0.00160736
	5	0.823378	0.00459481	0.823351	0.00459112	0.821273	0.00431953	0.821346	0.00432879			5	0.786613	0.00163259	0.786425	0.00162433	0.78657	0.00163067	0.786032	0.00160723			5	0.823378	0.00459481	0.823351	0.00459112	0.821273	0.00431953	0.821346	0.00432879			5	0.786613	0.00163259	0.786425	0.00162433	0.78657	0.00163067	0.786032	0.00160723
	20	-	-	-	-	-	-	0.821344	0.00432848			20	-	-	-	-	-	-	0.786031	0.00160719			20	-	-	-	-	-	-	0.821344	0.00432848			20	-	-	-	-	-	-	0.786031	0.00160719
	100	-	-	-	-	-	-	-	-			100	-	-	-	-	-	-	-	-			100	-	-	-	-	-	-	-	-			100	-	-	-	-	-	-	-	-
	200	-	-	-	-	-	-	-	-			200	-	-	-	-	-	-	-	-			200	-	-	-	-	-	-	-	-			200	-	-	-	-	-	-	-	-
	500	-	-	-	-	-	-	-	-			500	-	-	-	-	-	-	-	-			500	-	-	-	-	-	-	-	-			500	-	-	-	-	-	-	-	-
	1000	-	-	-	-	-	-	-	-			1000	-	-	-	-	-	-	-	-			1000	-	-	-	-	-	-	-	-			1000	-	-	-	-	-	-	-	-
FIR	3	0.821289	0.0043216	0.821289	0.0043216	0.82129	0.00432162	0.821294	0.00432217		FIR	3	0.785977	0.00160488	0.785977	0.00160488	0.785977	0.00160488	0.785977	0.00160486		FIR	3	0.821289	0.0043216	0.821289	0.0043216	0.82129	0.00432162	0.821294	0.00432217		FIR	3	0.785977	0.00160488	0.785977	0.00160488	0.785977	0.00160488	0.785977	0.00160486
	4	0.821221	0.00431302	0.821222	0.00431303	0.821222	0.0043131	0.821235	0.00431468			4	0.785982	0.00160508	0.785982	0.00160508	0.785982	0.00160508	0.785982	0.00160506			4	0.821221	0.00431302	0.821222	0.00431303	0.821222	0.0043131	0.821235	0.00431468			4	0.785982	0.00160508	0.785982	0.00160508	0.785982	0.00160508	0.785982	0.00160506
	5	0.821142	0.00430295	0.821142	0.00430298	0.821143	0.00430313	0.821171	0.00430664			5	0.785989	0.0016054	0.785989	0.0016054	0.785989	0.00160539	0.785985	0.00160521			5	0.821142	0.00430295	0.821142	0.00430298	0.821143	0.00430313	0.821171	0.00430664			5	0.785989	0.0016054	0.785989	0.0016054	0.785989	0.00160539	0.785985	0.00160521
	20	0.818481	0.0039817	0.818518	0.00398603	0.818704	0.00400765	0.82117	0.0043065			20	0.785407	0.00158045	0.78542	0.001581	0.785483	0.00158367	0.786097	0.00161006			20	0.818481	0.0039817	0.818518	0.00398603	0.818704	0.00400765	0.82117	0.0043065			20	0.785407	0.00158045	0.78542	0.001581	0.785483	0.00158367	0.786097	0.00161006
	100	0.81118	0.0032265	0.815059	0.0036063	0.820953	0.00427923	0.821667	0.0043696			100	0.783587	0.00150518	0.786255	0.0016169	0.787182	0.0016578	0.786369	0.00162187			100	0.81118	0.0032265	0.815059	0.0036063	0.820953	0.00427923	0.821667	0.0043696			100	0.783587	0.00150518	0.786255	0.0016169	0.787182	0.0016578	0.786369	0.00162187
	200	0.819056	0.0040489	0.822126	0.00442882	0.821567	0.00435692	0.821711	0.00437529			200	0.789276	0.00175441	0.78913	0.00174746	0.787239	0.00166037	0.786391	0.00162286			200	0.819056	0.0040489	0.822126	0.00442882	0.821567	0.00435692	0.821711	0.00437529			200	0.789276	0.00175441	0.78913	0.00174746	0.787239	0.00166037	0.786391	0.00162286
	500	0.821582	0.00435881	0.823187	0.004569	0.820908	0.00427369	0.821459	0.0043431			500	0.78784	0.00168754	0.787791	0.00168529	0.786876	0.00164417	0.786082	0.00160941			500	0.821582	0.00435881	0.823187	0.004569	0.820908	0.00427369	0.821459	0.0043431			500	0.78784	0.00168754	0.787791	0.00168529	0.786876	0.00164417	0.786082	0.00160941
	1000	0.82283	0.00452133	0.823115	0.00455941	0.820751	0.0042541	0.821421	0.00433834			1000	0.788321	0.00170962	0.787654	0.00167906	0.786875	0.00164416	0.786079	0.00160929			1000	0.82283	0.00452133	0.823115	0.00455941	0.820751	0.0042541	0.821421	0.00433834			1000	0.788321	0.00170962	0.787654	0.00167906	0.786875	0.00164416	0.786079	0.00160929
MovAvg	-	0.820975	0.00428205	0.821125	0.00430083	0.821241	0.00431548	-	-		MovAvg	-	0.786004	0.00160602	0.785997	0.00160575	0.785984	0.00160518	-	-		MovAvg	-	0.820975	0.00428205	0.821125	0.00430083	0.821241	0.00431548	-	-		MovAvg	-	0.786004	0.00160602	0.785997	0.00160575	0.785984	0.00160518	-	-

## Sheet: Down-sampling
Amplitude 1
BP
HbO2C		0.01-0.09		0.01-0.2		0.01-0.3		0.01-0.5			HbRC		0.01-0.09		0.01-0.2		0.01-0.3		0.01-0.5			HbO2OD		0.01-0.09		0.01-0.2		0.01-0.3		0.01-0.5			HbROD		0.01-0.09		0.01-0.2		0.01-0.3		0.01-0.5
		W(18)	p	W(18)	p	W(18)	p	W(18)	p				W(18)	p	W(18)	p	W(18)	p	W(18)	p				W(18)	p	W(18)	p	W(18)	p	W(18)	p				W(18)	p	W(18)	p	W(18)	p	W(18)	p
BW	3	0.933432	0.22305	0.937529	0.26278	0.937694	0.264515	0.935245	0.239889		BW	3	0.957852	0.56075	0.955246	0.513081	0.955877	0.524411	0.956543	0.536508		BW	3	0.933432	0.22305	0.937529	0.26278	0.937694	0.264515	0.935245	0.239889		BW	3	0.957852	0.56075	0.955246	0.513081	0.955877	0.524411	0.956543	0.536508
	4	0.93164	0.207509	0.929533	0.190553	0.933161	0.220628	0.932941	0.218679			4	0.956474	0.535244	0.95241	0.464058	0.954662	0.50273	0.956604	0.537634			4	0.93164	0.207509	0.929533	0.190553	0.933161	0.220628	0.932941	0.218679			4	0.956474	0.535244	0.95241	0.464058	0.954662	0.50273	0.956604	0.537634
	5	-	-	0.942691	0.321988	0.941809	0.311103	0.944179	0.341089			5	-	-	0.957542	0.554959	0.958797	0.578587	0.962035	0.641349			5	-	-	0.942691	0.321988	0.941809	0.311103	0.944179	0.341089			5	-	-	0.957542	0.554959	0.958797	0.578587	0.962035	0.641349
	20	-	-	-	-	-	-	-	-			20	-	-	-	-	-	-	-	-			20	-	-	-	-	-	-	-	-			20	-	-	-	-	-	-	-	-
	100	-	-	-	-	-	-	-	-			100	-	-	-	-	-	-	-	-			100	-	-	-	-	-	-	-	-			100	-	-	-	-	-	-	-	-
	200	-	-	-	-	-	-	-	-			200	-	-	-	-	-	-	-	-			200	-	-	-	-	-	-	-	-			200	-	-	-	-	-	-	-	-
	500	-	-	-	-	-	-	-	-			500	-	-	-	-	-	-	-	-			500	-	-	-	-	-	-	-	-			500	-	-	-	-	-	-	-	-
	1000	-	-	-	-	-	-	-	-			1000	-	-	-	-	-	-	-	-			1000	-	-	-	-	-	-	-	-			1000	-	-	-	-	-	-	-	-
FIR	3	0.747711	0.000598113	0.747719	0.000598219	0.74773	0.000598383	0.747765	0.000598901		FIR	3	0.783051	0.00148377	0.783086	0.00148516	0.783141	0.00148734	0.783313	0.0014942		FIR	3	0.747711	0.000598113	0.747719	0.000598219	0.74773	0.000598383	0.747765	0.000598901		FIR	3	0.783051	0.00148377	0.783086	0.00148516	0.783141	0.00148734	0.783313	0.0014942
	4	0.747128	0.000589542	0.747141	0.000589729	0.747161	0.00059002	0.747225	0.000590968			4	0.77996	0.00136652	0.780028	0.001369	0.780135	0.00137287	0.78048	0.0013855			4	0.747128	0.000589542	0.747141	0.000589729	0.747161	0.00059002	0.747225	0.000590968			4	0.77996	0.00136652	0.780028	0.001369	0.780135	0.00137287	0.78048	0.0013855
	5	0.74683	0.000585219	0.746839	0.000585352	0.746853	0.000585559	0.7469	0.000586236			5	0.777855	0.00129244	0.777945	0.00129552	0.778086	0.00130038	0.778554	0.00131657			5	0.74683	0.000585219	0.746839	0.000585352	0.746853	0.000585559	0.7469	0.000586236			5	0.777855	0.00129244	0.777945	0.00129552	0.778086	0.00130038	0.778554	0.00131657
	20	0.744791	0.000556532	0.745253	0.00056289	0.74586	0.000571377	0.746831	0.00058524			20	0.773496	0.00115252	0.774049	0.00116933	0.774767	0.00119155	0.775961	0.0012295			20	0.744791	0.000556532	0.745253	0.00056289	0.74586	0.000571377	0.746831	0.00058524			20	0.773496	0.00115252	0.774049	0.00116933	0.774767	0.00119155	0.775961	0.0012295
	100	0.747581	0.000596188	0.758141	0.00077645	0.758365	0.000780881	0.758152	0.000776671			100	0.781616	0.00142805	0.796127	0.00211556	0.79586	0.00210006	0.795713	0.00209156			100	0.747581	0.000596188	0.758141	0.00077645	0.758365	0.000780881	0.758152	0.000776671			100	0.781616	0.00142805	0.796127	0.00211556	0.79586	0.00210006	0.795713	0.00209156
	200	0.818814	0.00402042	0.823704	0.00463903	0.823473	0.00460766	0.823101	0.00455752			200	0.918816	0.111052	0.918491	0.109709	0.918212	0.108574	0.917926	0.10742			200	0.818814	0.00402042	0.823704	0.00463903	0.823473	0.00460766	0.823101	0.00455752			200	0.918816	0.111052	0.918491	0.109709	0.918212	0.108574	0.917926	0.10742
	500	0.941807	0.31108	0.941664	0.309345	0.941321	0.305212	0.941103	0.302625			500	0.93933	0.282227	0.9408	0.299045	0.94087	0.299867	0.941049	0.30198			500	0.941807	0.31108	0.941664	0.309345	0.941321	0.305212	0.941103	0.302625			500	0.93933	0.282227	0.9408	0.299045	0.94087	0.299867	0.941049	0.30198
	1000	0.938857	0.276993	0.938446	0.272527	0.938404	0.272074	0.938228	0.270177			1000	0.971037	0.816959	0.97157	0.826642	0.971614	0.827434	0.971649	0.828063			1000	0.938857	0.276993	0.938446	0.272527	0.938404	0.272074	0.938228	0.270177			1000	0.971037	0.816959	0.97157	0.826642	0.971614	0.827434	0.971649	0.828063
LP
HbO2C		0.09		0.1		0.14		0.5			HbRC		0.09		0.1		0.14		0.5			HbO2OD		0.09		0.1		0.14		0.5			HbROD		0.09		0.1		0.14		0.5
		W(18)	p	W(18)	p	W(18)	p	W(18)	p				W(18)	p	W(18)	p	W(18)	p	W(18)	p				W(18)	p	W(18)	p	W(18)	p	W(18)	p				W(18)	p	W(18)	p	W(18)	p	W(18)	p
BW	3	0.745672	0.000568733	0.746166	0.000575707	0.746553	0.000581236	0.746852	0.000585537		BW	3	0.776278	0.00123981	0.776436	0.00124496	0.776354	0.00124228	0.7761	0.00123403		BW	3	0.745672	0.000568733	0.746166	0.000575707	0.746553	0.000581236	0.746852	0.000585537		BW	3	0.776278	0.00123981	0.776436	0.00124496	0.776354	0.00124228	0.7761	0.00123403
	4	0.746448	0.000579721	0.746774	0.000584408	0.746542	0.000581077	0.746848	0.000585475			4	0.776441	0.00124515	0.776528	0.00124801	0.776303	0.00124064	0.776035	0.00123191			4	0.746448	0.000579721	0.746774	0.000584408	0.746542	0.000581077	0.746848	0.000585475			4	0.776441	0.00124515	0.776528	0.00124801	0.776303	0.00124064	0.776035	0.00123191
	5	0.747372	0.000593105	0.747435	0.000594039	0.746594	0.000581814	0.746855	0.000585584			5	0.776645	0.00125185	0.776702	0.00125374	0.776445	0.00124528	0.776016	0.00123128			5	0.747372	0.000593105	0.747435	0.000594039	0.746594	0.000581814	0.746855	0.000585584			5	0.776645	0.00125185	0.776702	0.00125374	0.776445	0.00124528	0.776016	0.00123128
	20	-	-	-	-	-	-	0.746851	0.000585528			20	-	-	-	-	-	-	0.776	0.00123079			20	-	-	-	-	-	-	0.746851	0.000585528			20	-	-	-	-	-	-	0.776	0.00123079
	100	-	-	-	-	-	-	-	-			100	-	-	-	-	-	-	-	-			100	-	-	-	-	-	-	-	-			100	-	-	-	-	-	-	-	-
	200	-	-	-	-	-	-	-	-			200	-	-	-	-	-	-	-	-			200	-	-	-	-	-	-	-	-			200	-	-	-	-	-	-	-	-
	500	-	-	-	-	-	-	-	-			500	-	-	-	-	-	-	-	-			500	-	-	-	-	-	-	-	-			500	-	-	-	-	-	-	-	-
	1000	-	-	-	-	-	-	-	-			1000	-	-	-	-	-	-	-	-			1000	-	-	-	-	-	-	-	-			1000	-	-	-	-	-	-	-	-
FIR	3	0.747711	0.00059811	0.747712	0.000598116	0.747714	0.000598147	0.747763	0.000598884		FIR	3	0.78305	0.00148373	0.783052	0.00148381	0.783062	0.00148421	0.783308	0.00149397		FIR	3	0.747711	0.00059811	0.747712	0.000598116	0.747714	0.000598147	0.747763	0.000598884		FIR	3	0.78305	0.00148373	0.783052	0.00148381	0.783062	0.00148421	0.783308	0.00149397
	4	0.747127	0.000589537	0.747128	0.000589547	0.747132	0.000589602	0.747223	0.000590935			4	0.779958	0.00136644	0.779962	0.00136658	0.779982	0.00136731	0.780468	0.00138506			4	0.747127	0.000589537	0.747128	0.000589547	0.747132	0.000589602	0.747223	0.000590935			4	0.779958	0.00136644	0.779962	0.00136658	0.779982	0.00136731	0.780468	0.00138506
	5	0.74683	0.000585215	0.74683	0.000585223	0.746833	0.000585261	0.746899	0.000586212			5	0.777852	0.00129235	0.777857	0.00129252	0.777883	0.00129341	0.778538	0.00131599			5	0.74683	0.000585215	0.74683	0.000585223	0.746833	0.000585261	0.746899	0.000586212			5	0.777852	0.00129235	0.777857	0.00129252	0.777883	0.00129341	0.778538	0.00131599
	20	0.744776	0.000556322	0.744803	0.0005567	0.74494	0.00055858	0.746737	0.000583871			20	0.773477	0.00115196	0.77351	0.00115297	0.773675	0.00115795	0.775844	0.00122572			20	0.744776	0.000556322	0.744803	0.0005567	0.74494	0.00055858	0.746737	0.000583871			20	0.773477	0.00115196	0.77351	0.00115297	0.773675	0.00115795	0.775844	0.00122572
	100	0.739147	0.000484775	0.74239	0.00052469	0.746472	0.00058007	0.747109	0.000589269			100	0.767465	0.000985364	0.77225	0.00111562	0.77631	0.00124084	0.776484	0.00124655			100	0.739147	0.000484775	0.74239	0.00052469	0.746472	0.00058007	0.747109	0.000589269			100	0.767465	0.000985364	0.77225	0.00111562	0.77631	0.00124084	0.776484	0.00124655
	200	0.745219	0.000562421	0.747299	0.000592046	0.747041	0.000588278	0.747174	0.000590213			200	0.777499	0.00128036	0.778495	0.00131449	0.776872	0.00125936	0.776541	0.00124842			200	0.745219	0.000562421	0.747299	0.000592046	0.747041	0.000588278	0.747174	0.000590213			200	0.777499	0.00128036	0.778495	0.00131449	0.776872	0.00125936	0.776541	0.00124842
	500	0.747042	0.000588291	0.747838	0.000599983	0.746562	0.000581358	0.74691	0.000586374			500	0.776945	0.00126178	0.777413	0.00127747	0.776412	0.0012442	0.776095	0.00123386			500	0.747042	0.000588291	0.747838	0.000599983	0.746562	0.000581358	0.74691	0.000586374			500	0.776945	0.00126178	0.777413	0.00127747	0.776412	0.0012442	0.776095	0.00123386
	1000	0.747819	0.000599702	0.748002	0.000602436	0.746595	0.00058183	0.746918	0.000586497			1000	0.777846	0.00129213	0.777225	0.00127112	0.776349	0.00124212	0.776081	0.00123342			1000	0.747819	0.000599702	0.748002	0.000602436	0.746595	0.00058183	0.746918	0.000586497			1000	0.777846	0.00129213	0.777225	0.00127112	0.776349	0.00124212	0.776081	0.00123342
MovAvg	-	0.746562	0.000581357	0.746906	0.000586324	0.747245	0.000591257	-	-		MovAvg	-	0.775705	0.00122126	0.7766	0.00125037	0.779971	0.00136691	-	-		MovAvg	-	0.746562	0.000581357	0.746906	0.000586324	0.747245	0.000591257	-	-		MovAvg	-	0.775705	0.00122126	0.7766	0.00125037	0.779971	0.00136691	-	-
Amplitude 2
BP
HbO2C		0.01-0.09		0.01-0.2		0.01-0.3		0.01-0.5			HbRC		0.01-0.09		0.01-0.2		0.01-0.3		0.01-0.5			HbO2OD		0.01-0.09		0.01-0.2		0.01-0.3		0.01-0.5			HbROD		0.01-0.09		0.01-0.2		0.01-0.3		0.01-0.5
		W(18)	p	W(18)	p	W(18)	p	W(18)	p				W(18)	p	W(18)	p	W(18)	p	W(18)	p				W(18)	p	W(18)	p	W(18)	p	W(18)	p				W(18)	p	W(18)	p	W(18)	p	W(18)	p
BW	3	0.921655	0.138301	0.935202	0.239469	0.9341	0.229116	0.930998	0.202191		BW	3	0.950331	0.430237	0.93965	0.285818	0.945111	0.353534	0.948594	0.403396		BW	3	0.921655	0.138301	0.935202	0.239469	0.9341	0.229116	0.930998	0.202191		BW	3	0.950331	0.430237	0.93965	0.285818	0.945111	0.353534	0.948594	0.403396
	4	0.92564	0.162682	0.925828	0.163928	0.927561	0.175895	0.925331	0.160644			4	0.939144	0.280162	0.928665	0.18396	0.937693	0.264496	0.940217	0.292276			4	0.92564	0.162682	0.925828	0.163928	0.927561	0.175895	0.925331	0.160644			4	0.939144	0.280162	0.928665	0.18396	0.937693	0.264496	0.940217	0.292276
	5	-	-	0.918687	0.122531	0.915773	0.108806	0.919871	0.128592			5	-	-	0.9377	0.264578	0.942767	0.32294	0.946498	0.372753			5	-	-	0.918687	0.122531	0.915773	0.108806	0.919871	0.128592			5	-	-	0.9377	0.264578	0.942767	0.32294	0.946498	0.372753
	20	-	-	-	-	-	-	-	-			20	-	-	-	-	-	-	-	-			20	-	-	-	-	-	-	-	-			20	-	-	-	-	-	-	-	-
	100	-	-	-	-	-	-	-	-			100	-	-	-	-	-	-	-	-			100	-	-	-	-	-	-	-	-			100	-	-	-	-	-	-	-	-
	200	-	-	-	-	-	-	-	-			200	-	-	-	-	-	-	-	-			200	-	-	-	-	-	-	-	-			200	-	-	-	-	-	-	-	-
	500	-	-	-	-	-	-	-	-			500	-	-	-	-	-	-	-	-			500	-	-	-	-	-	-	-	-			500	-	-	-	-	-	-	-	-
	1000	-	-	-	-	-	-	-	-			1000	-	-	-	-	-	-	-	-			1000	-	-	-	-	-	-	-	-			1000	-	-	-	-	-	-	-	-
FIR	3	0.751492	0.00065702	0.751493	0.00065704	0.751495	0.000657072	0.751501	0.000657171		FIR	3	0.810698	0.00318246	0.81072	0.0031844	0.810753	0.00318744	0.810861	0.00319731		FIR	3	0.751492	0.00065702	0.751493	0.00065704	0.751495	0.000657072	0.751501	0.000657171		FIR	3	0.810698	0.00318246	0.81072	0.0031844	0.810753	0.00318744	0.810861	0.00319731
	4	0.751399	0.0006555	0.751401	0.000655534	0.751404	0.000655588	0.751415	0.000655764			4	0.808867	0.00302085	0.808908	0.00302438	0.808972	0.00302988	0.809179	0.00304773			4	0.751399	0.0006555	0.751401	0.000655534	0.751404	0.000655588	0.751415	0.000655764			4	0.808867	0.00302085	0.808908	0.00302438	0.808972	0.00302988	0.809179	0.00304773
	5	0.751406	0.000655614	0.751402	0.000655552	0.751396	0.000655451	0.751375	0.000655104			5	0.807654	0.00291881	0.807702	0.00292272	0.807776	0.00292888	0.808036	0.00295055			5	0.751406	0.000655614	0.751402	0.000655552	0.751396	0.000655451	0.751375	0.000655104			5	0.807654	0.00291881	0.807702	0.00292272	0.807776	0.00292888	0.808036	0.00295055
	20	0.749837	0.000630497	0.750251	0.000637024	0.750801	0.000645807	0.751713	0.00066065			20	0.8043	0.00265545	0.804838	0.00269588	0.805548	0.00275027	0.806746	0.00284475			20	0.749837	0.000630497	0.750251	0.000637024	0.750801	0.000645807	0.751713	0.00066065			20	0.8043	0.00265545	0.804838	0.00269588	0.805548	0.00275027	0.806746	0.00284475
	100	0.752288	0.000670204	0.761176	0.000838633	0.761547	0.000846593	0.761481	0.000845175			100	0.811455	0.00325192	0.825415	0.00487932	0.825192	0.00484727	0.825172	0.0048443			100	0.752288	0.000670204	0.761176	0.000838633	0.761547	0.000846593	0.761481	0.000845175			100	0.811455	0.00325192	0.825415	0.00487932	0.825192	0.00484727	0.825172	0.0048443
	200	0.822709	0.00450525	0.826426	0.00502757	0.826147	0.0049861	0.825921	0.0049529			200	0.934603	0.201598	0.933897	0.196258	0.933148	0.190757	0.932817	0.188369			200	0.822709	0.00450525	0.826426	0.00502757	0.826147	0.0049861	0.825921	0.0049529			200	0.934603	0.201598	0.933897	0.196258	0.933148	0.190757	0.932817	0.188369
	500	0.929997	0.194165	0.930466	0.197888	0.930485	0.198036	0.930229	0.195995			500	0.952281	0.461918	0.958677	0.576298	0.959227	0.586777	0.958824	0.57909			500	0.929997	0.194165	0.930466	0.197888	0.930485	0.198036	0.930229	0.195995			500	0.952281	0.461918	0.958677	0.576298	0.959227	0.586777	0.958824	0.57909
	1000	0.952858	0.471598	0.955085	0.510211	0.955243	0.513017	0.955047	0.509545			1000	0.960216	0.605816	0.962164	0.643896	0.962241	0.645407	0.961866	0.638031			1000	0.952858	0.471598	0.955085	0.510211	0.955243	0.513017	0.955047	0.509545			1000	0.960216	0.605816	0.962164	0.643896	0.962241	0.645407	0.961866	0.638031
LP
HbO2C		0.09		0.1		0.14		0.5			HbRC		0.09		0.1		0.14		0.5			HbO2OD		0.09		0.1		0.14		0.5			HbROD		0.09		0.1		0.14		0.5
		W(18)	p	W(18)	p	W(18)	p	W(18)	p				W(18)	p	W(18)	p	W(18)	p	W(18)	p				W(18)	p	W(18)	p	W(18)	p	W(18)	p				W(18)	p	W(18)	p	W(18)	p	W(18)	p
BW	3	0.75066	0.000643543	0.751021	0.000649345	0.751264	0.000653299	0.751735	0.000661024		BW	3	0.806682	0.00283967	0.806839	0.00285229	0.806948	0.00286107	0.806875	0.0028552		BW	3	0.75066	0.000643543	0.751021	0.000649345	0.751264	0.000653299	0.751735	0.000661024		BW	3	0.806682	0.00283967	0.806839	0.00285229	0.806948	0.00286107	0.806875	0.0028552
	4	0.75133	0.000654374	0.751518	0.000657451	0.751179	0.000651915	0.751752	0.0006613			4	0.806858	0.00285377	0.806934	0.00285997	0.806951	0.00286128	0.806849	0.00285312			4	0.75133	0.000654374	0.751518	0.000657451	0.751179	0.000651915	0.751752	0.0006613			4	0.806858	0.00285377	0.806934	0.00285997	0.806951	0.00286128	0.806849	0.00285312
	5	0.752171	0.000668245	0.752143	0.000667777	0.75124	0.000652908	0.751763	0.000661486			5	0.807084	0.00287207	0.807111	0.00287431	0.807092	0.00287274	0.806848	0.00285299			5	0.752171	0.000668245	0.752143	0.000667777	0.75124	0.000652908	0.751763	0.000661486			5	0.807084	0.00287207	0.807111	0.00287431	0.807092	0.00287274	0.806848	0.00285299
	20	-	-	-	-	-	-	0.75177	0.000661597			20	-	-	-	-	-	-	0.80684	0.00285239			20	-	-	-	-	-	-	0.75177	0.000661597			20	-	-	-	-	-	-	0.80684	0.00285239
	100	-	-	-	-	-	-	-	-			100	-	-	-	-	-	-	-	-			100	-	-	-	-	-	-	-	-			100	-	-	-	-	-	-	-	-
	200	-	-	-	-	-	-	-	-			200	-	-	-	-	-	-	-	-			200	-	-	-	-	-	-	-	-			200	-	-	-	-	-	-	-	-
	500	-	-	-	-	-	-	-	-			500	-	-	-	-	-	-	-	-			500	-	-	-	-	-	-	-	-			500	-	-	-	-	-	-	-	-
	1000	-	-	-	-	-	-	-	-			1000	-	-	-	-	-	-	-	-			1000	-	-	-	-	-	-	-	-			1000	-	-	-	-	-	-	-	-
FIR	3	0.751492	0.000657019	0.751492	0.000657021	0.751492	0.000657027	0.751501	0.000657168		FIR	3	0.810698	0.0031824	0.810699	0.00318251	0.810705	0.00318308	0.810858	0.00319699		FIR	3	0.751492	0.000657019	0.751492	0.000657021	0.751492	0.000657027	0.751501	0.000657168		FIR	3	0.810698	0.0031824	0.810699	0.00318251	0.810705	0.00318308	0.810858	0.00319699
	4	0.751399	0.000655499	0.751399	0.000655501	0.7514	0.000655511	0.751415	0.000655758			4	0.808865	0.00302074	0.808868	0.00302094	0.80888	0.00302197	0.809172	0.00304713			4	0.751399	0.000655499	0.751399	0.000655501	0.7514	0.000655511	0.751415	0.000655758			4	0.808865	0.00302074	0.808868	0.00302094	0.80888	0.00302197	0.809172	0.00304713
	5	0.751406	0.000655616	0.751406	0.000655613	0.751405	0.000655595	0.751376	0.000655117			5	0.807653	0.00291869	0.807656	0.00291891	0.807669	0.00292005	0.808027	0.00294974			5	0.751406	0.000655616	0.751406	0.000655613	0.751405	0.000655595	0.751376	0.000655117			5	0.807653	0.00291869	0.807656	0.00291891	0.807669	0.00292005	0.808027	0.00294974
	20	0.749823	0.000630282	0.749848	0.000630669	0.749971	0.000632596	0.751624	0.000659186			20	0.804283	0.00265412	0.804315	0.00265651	0.804474	0.00266845	0.806629	0.00283539			20	0.749823	0.000630282	0.749848	0.000630669	0.749971	0.000632596	0.751624	0.000659186			20	0.804283	0.00265412	0.804315	0.00265651	0.804474	0.00266845	0.806629	0.00283539
	100	0.744658	0.000554712	0.747669	0.000597487	0.751264	0.000653297	0.751995	0.000665318			100	0.798668	0.0022694	0.803045	0.00256363	0.806725	0.00284311	0.807261	0.00288651			100	0.744658	0.000554712	0.747669	0.000597487	0.751264	0.000653297	0.751995	0.000665318			100	0.798668	0.0022694	0.803045	0.00256363	0.806725	0.00284311	0.807261	0.00288651
	200	0.750376	0.00063901	0.752252	0.000669601	0.751654	0.000659677	0.752064	0.000666466			200	0.80768	0.00292093	0.808536	0.00299268	0.807295	0.00288929	0.807313	0.00289073			200	0.750376	0.00063901	0.752252	0.000669601	0.751654	0.000659677	0.752064	0.000666466			200	0.80768	0.00292093	0.808536	0.00299268	0.807295	0.00288929	0.807313	0.00289073
	500	0.751683	0.000660158	0.752804	0.00067891	0.751249	0.000653044	0.751854	0.000662978			500	0.806832	0.00285171	0.807696	0.00292225	0.807237	0.00288458	0.80696	0.00286202			500	0.751683	0.000660158	0.752804	0.00067891	0.751249	0.000653044	0.751854	0.000662978			500	0.806832	0.00285171	0.807696	0.00292225	0.807237	0.00288458	0.80696	0.00286202
	1000	0.752565	0.000674862	0.752841	0.000679532	0.75118	0.000651937	0.75183	0.000662583			1000	0.808167	0.00296146	0.807573	0.00291207	0.807216	0.00288279	0.806957	0.00286181			1000	0.752565	0.000674862	0.752841	0.000679532	0.75118	0.000651937	0.75183	0.000662583			1000	0.808167	0.00296146	0.807573	0.00291207	0.807216	0.00288279	0.806957	0.00286181
MovAvg	-	0.751469	0.000656649	0.751564	0.0006582	0.751445	0.000656246	-	-		MovAvg	-	0.806511	0.00282594	0.807303	0.00288994	0.809062	0.00303762	-	-		MovAvg	-	0.751469	0.000656649	0.751564	0.0006582	0.751445	0.000656246	-	-		MovAvg	-	0.806511	0.00282594	0.807303	0.00288994	0.809062	0.00303762	-	-
Amplitude 3
BP
HbO2C		0.01-0.09		0.01-0.2		0.01-0.3		0.01-0.5			HbRC		0.01-0.09		0.01-0.2		0.01-0.3		0.01-0.5			HbO2OD		0.01-0.09		0.01-0.2		0.01-0.3		0.01-0.5			HbROD		0.01-0.09		0.01-0.2		0.01-0.3		0.01-0.5
		W(18)	p	W(18)	p	W(18)	p	W(18)	p				W(18)	p	W(18)	p	W(18)	p	W(18)	p				W(18)	p	W(18)	p	W(18)	p	W(18)	p				W(18)	p	W(18)	p	W(18)	p	W(18)	p
BW	3	0.932378	0.213782	0.939112	0.279801	0.940966	0.301006	0.940428	0.294704		BW	3	0.930989	0.202118	0.922999	0.146088	0.927152	0.173	0.92768	0.176747		BW	3	0.932378	0.213782	0.939112	0.279801	0.940966	0.301006	0.940428	0.294704		BW	3	0.930989	0.202118	0.922999	0.146088	0.927152	0.173	0.92768	0.176747
	4	0.931696	0.207974	0.937273	0.260117	0.940733	0.298266	0.940451	0.294969			4	0.936859	0.255867	0.926472	0.16828	0.933522	0.223857	0.93063	0.199203			4	0.931696	0.207974	0.937273	0.260117	0.940733	0.298266	0.940451	0.294969			4	0.936859	0.255867	0.926472	0.16828	0.933522	0.223857	0.93063	0.199203
	5	-	-	0.93738	0.261234	0.936641	0.253654	0.938325	0.271222			5	-	-	0.934379	0.231699	0.931271	0.204432	0.931364	0.205203			5	-	-	0.93738	0.261234	0.936641	0.253654	0.938325	0.271222			5	-	-	0.934379	0.231699	0.931271	0.204432	0.931364	0.205203
	20	-	-	-	-	-	-	-	-			20	-	-	-	-	-	-	-	-			20	-	-	-	-	-	-	-	-			20	-	-	-	-	-	-	-	-
	100	-	-	-	-	-	-	-	-			100	-	-	-	-	-	-	-	-			100	-	-	-	-	-	-	-	-			100	-	-	-	-	-	-	-	-
	200	-	-	-	-	-	-	-	-			200	-	-	-	-	-	-	-	-			200	-	-	-	-	-	-	-	-			200	-	-	-	-	-	-	-	-
	500	-	-	-	-	-	-	-	-			500	-	-	-	-	-	-	-	-			500	-	-	-	-	-	-	-	-			500	-	-	-	-	-	-	-	-
	1000	-	-	-	-	-	-	-	-			1000	-	-	-	-	-	-	-	-			1000	-	-	-	-	-	-	-	-			1000	-	-	-	-	-	-	-	-
FIR	3	0.82097	0.00428142	0.820975	0.00428206	0.820983	0.00428304	0.821008	0.00428614		FIR	3	0.780828	0.00139838	0.780849	0.00139919	0.780883	0.00140044	0.780999	0.00140479		FIR	3	0.82097	0.00428142	0.820975	0.00428206	0.820983	0.00428304	0.821008	0.00428614		FIR	3	0.780828	0.00139838	0.780849	0.00139919	0.780883	0.00140044	0.780999	0.00140479
	4	0.820536	0.00422747	0.820546	0.0042287	0.820562	0.0042306	0.820611	0.00423674			4	0.779012	0.00133261	0.779052	0.00133401	0.779114	0.00133621	0.779315	0.00134336			4	0.820536	0.00422747	0.820546	0.0042287	0.820562	0.0042306	0.820611	0.00423674			4	0.779012	0.00133261	0.779052	0.00133401	0.779114	0.00133621	0.779315	0.00134336
	5	0.820305	0.00419899	0.820311	0.00419973	0.82032	0.00420088	0.82035	0.00420449			5	0.77796	0.00129603	0.778003	0.00129752	0.778072	0.00129987	0.778299	0.00130769			5	0.820305	0.00419899	0.820311	0.00419973	0.82032	0.00420088	0.82035	0.00420449			5	0.77796	0.00129603	0.778003	0.00129752	0.778072	0.00129987	0.778299	0.00130769
	20	0.817488	0.00386858	0.818164	0.00394521	0.819056	0.00404893	0.820505	0.00422357			20	0.776162	0.00123603	0.77638	0.00124313	0.776661	0.00125236	0.777104	0.0012671			20	0.817488	0.00386858	0.818164	0.00394521	0.819056	0.00404893	0.820505	0.00422357			20	0.776162	0.00123603	0.77638	0.00124313	0.776661	0.00125236	0.777104	0.0012671
	100	0.819896	0.00414916	0.836262	0.00675452	0.836553	0.00681449	0.836393	0.00678157			100	0.781652	0.00142942	0.786487	0.00162703	0.786373	0.00162205	0.786265	0.00161736			100	0.819896	0.00414916	0.836262	0.00675452	0.836553	0.00681449	0.836393	0.00678157			100	0.781652	0.00142942	0.786487	0.00162703	0.786373	0.00162205	0.786265	0.00161736
	200	0.898132	0.0520753	0.903559	0.0633084	0.903453	0.0630666	0.903264	0.0626346			200	0.862679	0.0155111	0.859645	0.014057	0.859133	0.0138262	0.859074	0.0137999			200	0.898132	0.0520753	0.903559	0.0633084	0.903453	0.0630666	0.903264	0.0626346			200	0.862679	0.0155111	0.859645	0.014057	0.859133	0.0138262	0.859074	0.0137999
	500	0.938916	0.277642	0.940871	0.299886	0.940675	0.297587	0.940454	0.295007			500	0.949997	0.424975	0.950646	0.435236	0.950692	0.435979	0.950736	0.436679			500	0.938916	0.277642	0.940871	0.299886	0.940675	0.297587	0.940454	0.295007			500	0.949997	0.424975	0.950646	0.435236	0.950692	0.435979	0.950736	0.436679
	1000	0.946487	0.372596	0.948301	0.39899	0.948373	0.40007	0.948146	0.396679			1000	0.943051	0.326515	0.942804	0.323395	0.942563	0.32038	0.942738	0.322573			1000	0.946487	0.372596	0.948301	0.39899	0.948373	0.40007	0.948146	0.396679			1000	0.943051	0.326515	0.942804	0.323395	0.942563	0.32038	0.942738	0.322573
LP
HbO2C		0.09		0.1		0.14		0.5			HbRC		0.09		0.1		0.14		0.5			HbO2OD		0.09		0.1		0.14		0.5			HbROD		0.09		0.1		0.14		0.5
		W(18)	p	W(18)	p	W(18)	p	W(18)	p				W(18)	p	W(18)	p	W(18)	p	W(18)	p				W(18)	p	W(18)	p	W(18)	p	W(18)	p				W(18)	p	W(18)	p	W(18)	p	W(18)	p
BW	3	0.818188	0.00394793	0.819155	0.00406058	0.820066	0.00416978	0.820539	0.00422777		BW	3	0.778318	0.00130837	0.778025	0.00129826	0.777463	0.00127913	0.77715	0.00126862		BW	3	0.818188	0.00394793	0.819155	0.00406058	0.820066	0.00416978	0.820539	0.00422777		BW	3	0.778318	0.00130837	0.778025	0.00129826	0.777463	0.00127913	0.77715	0.00126862
	4	0.819464	0.00409729	0.820191	0.004185	0.820123	0.00417675	0.820545	0.00422849			4	0.778216	0.00130483	0.777864	0.00129276	0.777346	0.0012752	0.777132	0.00126801			4	0.819464	0.00409729	0.820191	0.004185	0.820123	0.00417675	0.820545	0.00422849			4	0.778216	0.00130483	0.777864	0.00129276	0.777346	0.0012752	0.777132	0.00126801
	5	0.820777	0.00425731	0.821164	0.00430579	0.820156	0.0041808	0.820554	0.00422966			5	0.778231	0.00130536	0.777866	0.00129284	0.777405	0.00127717	0.777132	0.00126803			5	0.820777	0.00425731	0.821164	0.00430579	0.820156	0.0041808	0.820554	0.00422966			5	0.778231	0.00130536	0.777866	0.00129284	0.777405	0.00127717	0.777132	0.00126803
	20	-	-	-	-	-	-	0.820557	0.00423003			20	-	-	-	-	-	-	0.777135	0.00126811			20	-	-	-	-	-	-	0.820557	0.00423003			20	-	-	-	-	-	-	0.777135	0.00126811
	100	-	-	-	-	-	-	-	-			100	-	-	-	-	-	-	-	-			100	-	-	-	-	-	-	-	-			100	-	-	-	-	-	-	-	-
	200	-	-	-	-	-	-	-	-			200	-	-	-	-	-	-	-	-			200	-	-	-	-	-	-	-	-			200	-	-	-	-	-	-	-	-
	500	-	-	-	-	-	-	-	-			500	-	-	-	-	-	-	-	-			500	-	-	-	-	-	-	-	-			500	-	-	-	-	-	-	-	-
	1000	-	-	-	-	-	-	-	-			1000	-	-	-	-	-	-	-	-			1000	-	-	-	-	-	-	-	-			1000	-	-	-	-	-	-	-	-
FIR	3	0.82097	0.0042814	0.82097	0.00428143	0.820972	0.00428162	0.821007	0.00428604		FIR	3	0.780827	0.00139836	0.780828	0.00139841	0.780835	0.00139864	0.780996	0.00140464		FIR	3	0.82097	0.0042814	0.82097	0.00428143	0.820972	0.00428162	0.821007	0.00428604		FIR	3	0.780827	0.00139836	0.780828	0.00139841	0.780835	0.00139864	0.780996	0.00140464
	4	0.820536	0.00422744	0.820537	0.00422751	0.820539	0.00422786	0.82061	0.00423654			4	0.779011	0.00133256	0.779013	0.00133265	0.779025	0.00133305	0.779309	0.00134312			4	0.820536	0.00422744	0.820537	0.00422751	0.820539	0.00422786	0.82061	0.00423654			4	0.779011	0.00133256	0.779013	0.00133265	0.779025	0.00133305	0.779309	0.00134312
	5	0.820305	0.00419896	0.820305	0.00419901	0.820307	0.00419922	0.820349	0.00420437			5	0.777959	0.00129599	0.777961	0.00129607	0.777974	0.0012965	0.778291	0.00130741			5	0.820305	0.00419896	0.820305	0.00419901	0.820307	0.00419922	0.820349	0.00420437			5	0.777959	0.00129599	0.777961	0.00129607	0.777974	0.0012965	0.778291	0.00130741
	20	0.817466	0.00386607	0.817506	0.0038706	0.817707	0.00389317	0.820363	0.00420618			20	0.776155	0.00123579	0.776168	0.00123622	0.776233	0.00123833	0.777061	0.00126566			20	0.817466	0.00386607	0.817506	0.0038706	0.817707	0.00389317	0.820363	0.00420618			20	0.776155	0.00123579	0.776168	0.00123622	0.776233	0.00123833	0.777061	0.00126566
	100	0.810707	0.00318324	0.81417	0.00351509	0.819972	0.00415845	0.820889	0.00427128			100	0.774252	0.00117558	0.776567	0.00124928	0.777475	0.00127954	0.777399	0.00127698			100	0.810707	0.00318324	0.81417	0.00351509	0.819972	0.00415845	0.820889	0.00427128			100	0.774252	0.00117558	0.776567	0.00124928	0.777475	0.00127954	0.777399	0.00127698
	200	0.817396	0.00385831	0.820812	0.00426171	0.82078	0.00425771	0.820947	0.00427856			200	0.779299	0.00134276	0.77907	0.00133465	0.777527	0.00128131	0.777426	0.00127789			200	0.817396	0.00385831	0.820812	0.00426171	0.82078	0.00425771	0.820947	0.00427856			200	0.779299	0.00134276	0.77907	0.00133465	0.777527	0.00128131	0.777426	0.00127789
	500	0.820827	0.00426352	0.822244	0.00444422	0.82018	0.00418367	0.820655	0.00424217			500	0.77776	0.00128921	0.777985	0.0012969	0.777359	0.00127564	0.777188	0.00126989			500	0.820827	0.00426352	0.822244	0.00444422	0.82018	0.00418367	0.820655	0.00424217			500	0.77776	0.00128921	0.777985	0.0012969	0.777359	0.00127564	0.777188	0.00126989
	1000	0.822065	0.00442093	0.822321	0.00445429	0.820135	0.00417821	0.820636	0.00423985			1000	0.778374	0.00131031	0.777869	0.00129293	0.777357	0.00127557	0.777183	0.00126974			1000	0.822065	0.00442093	0.822321	0.00445429	0.820135	0.00417821	0.820636	0.00423985			1000	0.778374	0.00131031	0.777869	0.00129293	0.777357	0.00127557	0.777183	0.00126974
MovAvg	-	0.820117	0.00417597	0.820392	0.00420964	0.820623	0.00423816	-	-		MovAvg	-	0.776996	0.0012635	0.777687	0.00128671	0.779184	0.00133871	-	-		MovAvg	-	0.820117	0.00417597	0.820392	0.00420964	0.820623	0.00423816	-	-		MovAvg	-	0.776996	0.0012635	0.777687	0.00128671	0.779184	0.00133871	-	-

## Sheet: Precoloring
Amplitude 1
BP
HbO2C		0.01-0.09		0.01-0.2		0.01-0.3		0.01-0.5			HbRC		0.01-0.09		0.01-0.2		0.01-0.3		0.01-0.5			HbO2OD		0.01-0.09		0.01-0.2		0.01-0.3		0.01-0.5			HbROD		0.01-0.09		0.01-0.2		0.01-0.3		0.01-0.5
		W(18)	p	W(18)	p	W(18)	p	W(18)	p				W(18)	p	W(18)	p	W(18)	p	W(18)	p				W(18)	p	W(18)	p	W(18)	p	W(18)	p				W(18)	p	W(18)	p	W(18)	p	W(18)	p
BW	3	0.914388	0.10284	0.905047	0.0704007	0.905206	0.0708534	0.904613	0.0691769		BW	3	0.95362	0.484591	0.954673	0.502928	0.954404	0.498204	0.953303	0.479157		BW	3	0.914388	0.10284	0.905047	0.0704007	0.905206	0.0708534	0.904613	0.0691769		BW	3	0.95362	0.484591	0.954673	0.502928	0.954404	0.498204	0.953303	0.479157
	4	0.922274	0.141833	0.907925	0.0790913	0.909297	0.0836126	0.908482	0.080896			4	0.954988	0.508488	0.951207	0.444258	0.953006	0.474103	0.953098	0.475654			4	0.922274	0.141833	0.907925	0.0790913	0.909297	0.0836126	0.908482	0.080896			4	0.954988	0.508488	0.951207	0.444258	0.953006	0.474103	0.953098	0.475654
	5	-	-	0.93185	0.209269	0.931223	0.204038	0.929172	0.187785			5	-	-	0.954566	0.501042	0.952802	0.470649	0.95248	0.465243			5	-	-	0.93185	0.209269	0.931223	0.204038	0.929172	0.187785			5	-	-	0.954566	0.501042	0.952802	0.470649	0.95248	0.465243
	20	-	-	-	-	-	-	-	-			20	-	-	-	-	-	-	-	-			20	-	-	-	-	-	-	-	-			20	-	-	-	-	-	-	-	-
	100	-	-	-	-	-	-	-	-			100	-	-	-	-	-	-	-	-			100	-	-	-	-	-	-	-	-			100	-	-	-	-	-	-	-	-
	200	-	-	-	-	-	-	-	-			200	-	-	-	-	-	-	-	-			200	-	-	-	-	-	-	-	-			200	-	-	-	-	-	-	-	-
	500	-	-	-	-	-	-	-	-			500	-	-	-	-	-	-	-	-			500	-	-	-	-	-	-	-	-			500	-	-	-	-	-	-	-	-
	1000	-	-	-	-	-	-	-	-			1000	-	-	-	-	-	-	-	-			1000	-	-	-	-	-	-	-	-			1000	-	-	-	-	-	-	-	-
FIR	3	0.76941	0.0010362	0.76941	0.00103621	0.769411	0.00103622	0.769413	0.00103628		FIR	3	0.812307	0.00333216	0.812307	0.00333219	0.812308	0.00333223	0.812309	0.00333236		FIR	3	0.76941	0.0010362	0.76941	0.00103621	0.769411	0.00103622	0.769413	0.00103628		FIR	3	0.812307	0.00333216	0.812307	0.00333219	0.812308	0.00333223	0.812309	0.00333236
	4	0.769366	0.00103502	0.769367	0.00103505	0.769369	0.0010351	0.769375	0.00103526			4	0.812272	0.00332887	0.812273	0.00332896	0.812275	0.00332911	0.81228	0.00332957			4	0.769366	0.00103502	0.769367	0.00103505	0.769369	0.0010351	0.769375	0.00103526			4	0.812272	0.00332887	0.812273	0.00332896	0.812275	0.00332911	0.81228	0.00332957
	5	0.769313	0.0010336	0.769316	0.00103367	0.76932	0.00103379	0.769333	0.00103413			5	0.812224	0.00332421	0.812226	0.00332446	0.81223	0.00332484	0.812242	0.003326			5	0.769313	0.0010336	0.769316	0.00103367	0.76932	0.00103379	0.769333	0.00103413			5	0.812224	0.00332421	0.812226	0.00332446	0.81223	0.00332484	0.812242	0.003326
	20	0.767431	0.000984508	0.767879	0.000995952	0.768472	0.00101134	0.769451	0.00103731			20	0.809871	0.00310833	0.810469	0.00316177	0.811246	0.00323257	0.812459	0.0033467			20	0.767431	0.000984508	0.767879	0.000995952	0.768472	0.00101134	0.769451	0.00103731			20	0.809871	0.00310833	0.810469	0.00316177	0.811246	0.00323257	0.812459	0.0033467
	100	0.771399	0.00109117	0.781872	0.00143781	0.781797	0.00143494	0.781623	0.00142828			100	0.820735	0.00425213	0.833872	0.00628254	0.833678	0.00624587	0.833077	0.00613355			100	0.771399	0.00109117	0.781872	0.00143781	0.781797	0.00143494	0.781623	0.00142828			100	0.820735	0.00425213	0.833872	0.00628254	0.833678	0.00624587	0.833077	0.00613355
	200	0.853024	0.0113702	0.854307	0.0118438	0.853973	0.0117186	0.853781	0.0116471			200	0.940659	0.297396	0.940998	0.301384	0.94093	0.300582	0.940654	0.297335			200	0.853024	0.0113702	0.854307	0.0118438	0.853973	0.0117186	0.853781	0.0116471			200	0.940659	0.297396	0.940998	0.301384	0.94093	0.300582	0.940654	0.297335
	500	0.915739	0.108658	0.912579	0.0955374	0.91172	0.0922602	0.911408	0.0910953			500	0.927604	0.176203	0.931437	0.205814	0.931763	0.208542	0.931987	0.210436			500	0.915739	0.108658	0.912579	0.0955374	0.91172	0.0922602	0.911408	0.0910953			500	0.927604	0.176203	0.931437	0.205814	0.931763	0.208542	0.931987	0.210436
	1000	0.908698	0.0816085	0.906398	0.0743509	0.906081	0.0734024	0.906085	0.0734152			1000	0.960133	0.604209	0.960145	0.604426	0.960086	0.603295	0.959984	0.601323			1000	0.908698	0.0816085	0.906398	0.0743509	0.906081	0.0734024	0.906085	0.0734152			1000	0.960133	0.604209	0.960145	0.604426	0.960086	0.603295	0.959984	0.601323
LP
HbO2C		0.09		0.1		0.14		0.5			HbRC		0.09		0.1		0.14		0.5			HbO2OD		0.09		0.1		0.14		0.5			HbROD		0.09		0.1		0.14		0.5
		W(18)	p	W(18)	p	W(18)	p	W(18)	p				W(18)	p	W(18)	p	W(18)	p	W(18)	p				W(18)	p	W(18)	p	W(18)	p	W(18)	p				W(18)	p	W(18)	p	W(18)	p	W(18)	p
BW	3	0.769384	0.00103552	0.769397	0.00103586	0.769313	0.00103359	0.769474	0.00103794		BW	3	0.812782	0.00337783	0.812833	0.00338271	0.812813	0.0033808	0.81243	0.0033439		BW	3	0.769384	0.00103552	0.769397	0.00103586	0.769313	0.00103359	0.769474	0.00103794		BW	3	0.812782	0.00337783	0.812833	0.00338271	0.812813	0.0033808	0.81243	0.0033439
	4	0.770005	0.00105233	0.769831	0.00104757	0.769359	0.00103484	0.769473	0.00103789			4	0.812636	0.00336373	0.81267	0.00336697	0.812758	0.00337549	0.812427	0.00334361			4	0.770005	0.00105233	0.769831	0.00104757	0.769359	0.00103484	0.769473	0.00103789			4	0.812636	0.00336373	0.81267	0.00336697	0.812758	0.00337549	0.812427	0.00334361
	5	0.770831	0.00107515	0.770414	0.00106356	0.769455	0.00103741	0.769473	0.00103789			5	0.812694	0.00336931	0.812693	0.00336924	0.812841	0.00338352	0.81243	0.00334389			5	0.770831	0.00107515	0.770414	0.00106356	0.769455	0.00103741	0.769473	0.00103789			5	0.812694	0.00336931	0.812693	0.00336924	0.812841	0.00338352	0.81243	0.00334389
	20	-	-	-	-	-	-	0.769473	0.0010379			20	-	-	-	-	-	-	0.812435	0.00334444			20	-	-	-	-	-	-	0.769473	0.0010379			20	-	-	-	-	-	-	0.812435	0.00334444
	100	-	-	-	-	-	-	-	-			100	-	-	-	-	-	-	-	-			100	-	-	-	-	-	-	-	-			100	-	-	-	-	-	-	-	-
	200	-	-	-	-	-	-	-	-			200	-	-	-	-	-	-	-	-			200	-	-	-	-	-	-	-	-			200	-	-	-	-	-	-	-	-
	500	-	-	-	-	-	-	-	-			500	-	-	-	-	-	-	-	-			500	-	-	-	-	-	-	-	-			500	-	-	-	-	-	-	-	-
	1000	-	-	-	-	-	-	-	-			1000	-	-	-	-	-	-	-	-			1000	-	-	-	-	-	-	-	-			1000	-	-	-	-	-	-	-	-
FIR	3	0.76941	0.0010362	0.76941	0.0010362	0.76941	0.0010362	0.769413	0.00103627		FIR	3	0.812307	0.00333216	0.812307	0.00333216	0.812307	0.00333217	0.812309	0.00333235		FIR	3	0.76941	0.0010362	0.76941	0.0010362	0.76941	0.0010362	0.769413	0.00103627		FIR	3	0.812307	0.00333216	0.812307	0.00333216	0.812307	0.00333217	0.812309	0.00333235
	4	0.769366	0.00103502	0.769366	0.00103502	0.769366	0.00103503	0.769374	0.00103525			4	0.812272	0.00332887	0.812273	0.00332887	0.812273	0.0033289	0.81228	0.00332955			4	0.769366	0.00103502	0.769366	0.00103502	0.769366	0.00103503	0.769374	0.00103525			4	0.812272	0.00332887	0.812273	0.00332887	0.812273	0.0033289	0.81228	0.00332955
	5	0.769313	0.0010336	0.769313	0.0010336	0.769314	0.00103362	0.769332	0.00103412			5	0.812223	0.0033242	0.812224	0.00332422	0.812224	0.00332429	0.812242	0.00332596			5	0.769313	0.0010336	0.769313	0.0010336	0.769314	0.00103362	0.769332	0.00103412			5	0.812223	0.0033242	0.812224	0.00332422	0.812224	0.00332429	0.812242	0.00332596
	20	0.767417	0.00098413	0.767443	0.00098481	0.767576	0.000988195	0.769355	0.00103472			20	0.809851	0.00310655	0.809887	0.00310975	0.810066	0.00312564	0.81234	0.00333535			20	0.767417	0.00098413	0.767443	0.00098481	0.767576	0.000988195	0.769355	0.00103472			20	0.809851	0.00310655	0.809887	0.00310975	0.810066	0.00312564	0.81234	0.00333535
	100	0.762374	0.000864649	0.765583	0.000938732	0.769075	0.00102725	0.769786	0.00104637			100	0.8035	0.00259649	0.80922	0.00305131	0.813202	0.00341876	0.813052	0.00340407			100	0.762374	0.000864649	0.765583	0.000938732	0.769075	0.00102725	0.769786	0.00104637			100	0.8035	0.00259649	0.80922	0.00305131	0.813202	0.00341876	0.813052	0.00340407
	200	0.76877	0.00101917	0.770049	0.00105353	0.76972	0.00104456	0.769841	0.00104786			200	0.815506	0.00365303	0.816132	0.00371965	0.81377	0.00347491	0.813116	0.00341029			200	0.76877	0.00101917	0.770049	0.00105353	0.76972	0.00104456	0.769841	0.00104786			200	0.815506	0.00365303	0.816132	0.00371965	0.81377	0.00347491	0.813116	0.00341029
	500	0.76871	0.00101758	0.769816	0.00104718	0.769582	0.00104083	0.769558	0.00104019			500	0.813777	0.00347565	0.814154	0.00351354	0.813302	0.00342854	0.81255	0.00335538			500	0.76871	0.00101758	0.769816	0.00104718	0.769582	0.00104083	0.769558	0.00104019			500	0.813777	0.00347565	0.814154	0.00351354	0.813302	0.00342854	0.81255	0.00335538
	1000	0.769669	0.00104318	0.769833	0.00104763	0.769581	0.00104081	0.769546	0.00103987			1000	0.814765	0.00357579	0.813873	0.0034852	0.813196	0.0034181	0.812523	0.00335283			1000	0.769669	0.00104318	0.769833	0.00104763	0.769581	0.00104081	0.769546	0.00103987			1000	0.814765	0.00357579	0.813873	0.0034852	0.813196	0.0034181	0.812523	0.00335283
MovAvg	-	0.7692	0.00103058	0.769303	0.00103333	0.769379	0.00103538	-	-		MovAvg	-	0.812111	0.0033135	0.812216	0.00332349	0.812287	0.00333026	-	-		MovAvg	-	0.7692	0.00103058	0.769303	0.00103333	0.769379	0.00103538	-	-		MovAvg	-	0.812111	0.0033135	0.812216	0.00332349	0.812287	0.00333026	-	-
Amplitude 2
BP
HbO2C		0.01-0.09		0.01-0.2		0.01-0.3		0.01-0.5			HbRC		0.01-0.09		0.01-0.2		0.01-0.3		0.01-0.5			HbO2OD		0.01-0.09		0.01-0.2		0.01-0.3		0.01-0.5			HbROD		0.01-0.09		0.01-0.2		0.01-0.3		0.01-0.5
		W(18)	p	W(18)	p	W(18)	p	W(18)	p				W(18)	p	W(18)	p	W(18)	p	W(18)	p				W(18)	p	W(18)	p	W(18)	p	W(18)	p				W(18)	p	W(18)	p	W(18)	p	W(18)	p
BW	3	0.931726	0.208229	0.940943	0.30073	0.940781	0.298828	0.941148	0.303154		BW	3	0.929203	0.188015	0.927626	0.176365	0.929621	0.191235	0.929948	0.193784		BW	3	0.931726	0.208229	0.940943	0.30073	0.940781	0.298828	0.941148	0.303154		BW	3	0.929203	0.188015	0.927626	0.176365	0.929621	0.191235	0.929948	0.193784
	4	0.935918	0.246434	0.940468	0.295172	0.936451	0.251734	0.93531	0.240507			4	0.928755	0.184632	0.924702	0.156584	0.927378	0.174591	0.929372	0.189309			4	0.935918	0.246434	0.940468	0.295172	0.936451	0.251734	0.93531	0.240507			4	0.928755	0.184632	0.924702	0.156584	0.927378	0.174591	0.929372	0.189309
	5	-	-	0.938893	0.27739	0.936208	0.249307	0.934055	0.22871			5	-	-	0.931632	0.207437	0.932019	0.210707	0.933284	0.221728			5	-	-	0.938893	0.27739	0.936208	0.249307	0.934055	0.22871			5	-	-	0.931632	0.207437	0.932019	0.210707	0.933284	0.221728
	20	-	-	-	-	-	-	-	-			20	-	-	-	-	-	-	-	-			20	-	-	-	-	-	-	-	-			20	-	-	-	-	-	-	-	-
	100	-	-	-	-	-	-	-	-			100	-	-	-	-	-	-	-	-			100	-	-	-	-	-	-	-	-			100	-	-	-	-	-	-	-	-
	200	-	-	-	-	-	-	-	-			200	-	-	-	-	-	-	-	-			200	-	-	-	-	-	-	-	-			200	-	-	-	-	-	-	-	-
	500	-	-	-	-	-	-	-	-			500	-	-	-	-	-	-	-	-			500	-	-	-	-	-	-	-	-			500	-	-	-	-	-	-	-	-
	1000	-	-	-	-	-	-	-	-			1000	-	-	-	-	-	-	-	-			1000	-	-	-	-	-	-	-	-			1000	-	-	-	-	-	-	-	-
FIR	3	0.765881	0.000945956	0.765881	0.000945961	0.765882	0.000945969	0.765883	0.000945992		FIR	3	0.842336	0.00813608	0.842336	0.00813604	0.842336	0.00813597	0.842335	0.00813575		FIR	3	0.765881	0.000945956	0.765881	0.000945961	0.765882	0.000945969	0.765883	0.000945992		FIR	3	0.842336	0.00813608	0.842336	0.00813604	0.842336	0.00813597	0.842335	0.00813575
	4	0.765857	0.000945357	0.765857	0.000945374	0.765858	0.000945401	0.765862	0.000945483			4	0.842351	0.00813976	0.84235	0.00813969	0.84235	0.00813957	0.842348	0.00813919			4	0.765857	0.000945357	0.765857	0.000945374	0.765858	0.000945401	0.765862	0.000945483			4	0.842351	0.00813976	0.84235	0.00813969	0.84235	0.00813957	0.842348	0.00813919
	5	0.765822	0.000944518	0.765824	0.000944563	0.765827	0.000944631	0.765835	0.00094484			5	0.842357	0.00814128	0.842357	0.00814124	0.842356	0.00814118	0.842355	0.0081409			5	0.765822	0.000944518	0.765824	0.000944563	0.765827	0.000944631	0.765835	0.00094484			5	0.842357	0.00814128	0.842357	0.00814124	0.842356	0.00814118	0.842355	0.0081409
	20	0.764327	0.000908935	0.764689	0.000917415	0.765173	0.000928885	0.765952	0.000947671			20	0.8409	0.0077837	0.841356	0.00789379	0.84192	0.0080322	0.842634	0.00821133			20	0.764327	0.000908935	0.764689	0.000917415	0.765173	0.000928885	0.765952	0.000947671			20	0.8409	0.0077837	0.841356	0.00789379	0.84192	0.0080322	0.842634	0.00821133
	100	0.767491	0.000986024	0.77604	0.00123207	0.77603	0.00123176	0.7758	0.00122433			100	0.849401	0.01014	0.859813	0.0141333	0.859108	0.0138151	0.858354	0.0134832			100	0.767491	0.000986024	0.77604	0.00123207	0.77603	0.00123176	0.7758	0.00122433			100	0.849401	0.01014	0.859813	0.0141333	0.859108	0.0138151	0.858354	0.0134832
	200	0.843886	0.00853584	0.84397	0.00855802	0.843283	0.00837774	0.84279	0.00825096			200	0.971222	0.734222	0.971947	0.748897	0.971443	0.738694	0.970802	0.725693			200	0.843886	0.00853584	0.84397	0.00855802	0.843283	0.00837774	0.84279	0.00825096			200	0.971222	0.734222	0.971947	0.748897	0.971443	0.738694	0.970802	0.725693
	500	0.923908	0.151604	0.923528	0.149271	0.922936	0.145714	0.922642	0.143975			500	0.936644	0.253685	0.937277	0.260157	0.937873	0.266397	0.938042	0.268188			500	0.923908	0.151604	0.923528	0.149271	0.922936	0.145714	0.922642	0.143975			500	0.936644	0.253685	0.937277	0.260157	0.937873	0.266397	0.938042	0.268188
	1000	0.93303	0.219467	0.933472	0.223408	0.933529	0.223922	0.933686	0.225342			1000	0.956459	0.534978	0.957513	0.554413	0.95792	0.562021	0.958164	0.566615			1000	0.93303	0.219467	0.933472	0.223408	0.933529	0.223922	0.933686	0.225342			1000	0.956459	0.534978	0.957513	0.554413	0.95792	0.562021	0.958164	0.566615
LP
HbO2C		0.09		0.1		0.14		0.5			HbRC		0.09		0.1		0.14		0.5			HbO2OD		0.09		0.1		0.14		0.5			HbROD		0.09		0.1		0.14		0.5
		W(18)	p	W(18)	p	W(18)	p	W(18)	p				W(18)	p	W(18)	p	W(18)	p	W(18)	p				W(18)	p	W(18)	p	W(18)	p	W(18)	p				W(18)	p	W(18)	p	W(18)	p	W(18)	p
BW	3	0.765913	0.000946741	0.76594	0.000947396	0.765866	0.000945596	0.765956	0.000947775		BW	3	0.843179	0.00835083	0.843262	0.00837227	0.843324	0.00838829	0.842511	0.00818017		BW	3	0.765913	0.000946741	0.76594	0.000947396	0.765866	0.000945596	0.765956	0.000947775		BW	3	0.843179	0.00835083	0.843262	0.00837227	0.843324	0.00838829	0.842511	0.00818017
	4	0.766478	0.000960607	0.766335	0.000957058	0.765887	0.000946106	0.765952	0.000947673			4	0.843135	0.00833946	0.843158	0.0083455	0.843271	0.00837475	0.842503	0.0081782			4	0.766478	0.000960607	0.766335	0.000957058	0.765887	0.000946106	0.765952	0.000947673			4	0.843135	0.00833946	0.843158	0.0083455	0.843271	0.00837475	0.842503	0.0081782
	5	0.767234	0.000979516	0.766887	0.000970785	0.765978	0.000948307	0.76595	0.000947621			5	0.843265	0.00837301	0.843236	0.00836549	0.843363	0.00839862	0.8425	0.00817726			5	0.767234	0.000979516	0.766887	0.000970785	0.765978	0.000948307	0.76595	0.000947621			5	0.843265	0.00837301	0.843236	0.00836549	0.843363	0.00839862	0.8425	0.00817726
	20	-	-	-	-	-	-	0.765942	0.000947447			20	-	-	-	-	-	-	0.842496	0.00817626			20	-	-	-	-	-	-	0.765942	0.000947447			20	-	-	-	-	-	-	0.842496	0.00817626
	100	-	-	-	-	-	-	-	-			100	-	-	-	-	-	-	-	-			100	-	-	-	-	-	-	-	-			100	-	-	-	-	-	-	-	-
	200	-	-	-	-	-	-	-	-			200	-	-	-	-	-	-	-	-			200	-	-	-	-	-	-	-	-			200	-	-	-	-	-	-	-	-
	500	-	-	-	-	-	-	-	-			500	-	-	-	-	-	-	-	-			500	-	-	-	-	-	-	-	-			500	-	-	-	-	-	-	-	-
	1000	-	-	-	-	-	-	-	-			1000	-	-	-	-	-	-	-	-			1000	-	-	-	-	-	-	-	-			1000	-	-	-	-	-	-	-	-
FIR	3	0.765881	0.000945956	0.765881	0.000945956	0.765881	0.000945958	0.765883	0.000945991		FIR	3	0.842336	0.00813609	0.842336	0.00813608	0.842336	0.00813607	0.842335	0.00813576		FIR	3	0.765881	0.000945956	0.765881	0.000945956	0.765881	0.000945958	0.765883	0.000945991		FIR	3	0.842336	0.00813609	0.842336	0.00813608	0.842336	0.00813607	0.842335	0.00813576
	4	0.765857	0.000945357	0.765857	0.000945358	0.765857	0.000945363	0.765862	0.00094548			4	0.842351	0.00813977	0.842351	0.00813976	0.842351	0.00813974	0.842349	0.0081392			4	0.765857	0.000945357	0.765857	0.000945358	0.765857	0.000945363	0.765862	0.00094548			4	0.842351	0.00813977	0.842351	0.00813976	0.842351	0.00813974	0.842349	0.0081392
	5	0.765822	0.000944517	0.765822	0.000944519	0.765823	0.000944532	0.765835	0.000944833			5	0.842357	0.00814128	0.842357	0.00814128	0.842357	0.00814127	0.842355	0.00814091			5	0.765822	0.000944517	0.765822	0.000944519	0.765823	0.000944532	0.765835	0.000944833			5	0.842357	0.00814128	0.842357	0.00814128	0.842357	0.00814127	0.842355	0.00814091
	20	0.764315	0.000908654	0.764336	0.000909159	0.764444	0.000911671	0.765876	0.000945818			20	0.840884	0.00777999	0.840912	0.00778666	0.841049	0.00781965	0.842564	0.00819362			20	0.764315	0.000908654	0.764336	0.000909159	0.764444	0.000911671	0.765876	0.000945818			20	0.840884	0.00777999	0.840912	0.00778666	0.841049	0.00781965	0.842564	0.00819362
	100	0.760164	0.000817321	0.762793	0.000873945	0.765691	0.000941351	0.766198	0.000953707			100	0.835314	0.00656295	0.840226	0.00762412	0.843672	0.00847933	0.843004	0.00830585			100	0.760164	0.000817321	0.762793	0.000873945	0.765691	0.000941351	0.766198	0.000953707			100	0.835314	0.00656295	0.840226	0.00762412	0.843672	0.00847933	0.843004	0.00830585
	200	0.765453	0.000935607	0.766588	0.000963327	0.766179	0.000953246	0.766248	0.000954935			200	0.845356	0.00893453	0.845922	0.00909332	0.84411	0.00859534	0.84302	0.00830997			200	0.765453	0.000935607	0.766588	0.000963327	0.766179	0.000953246	0.766248	0.000954935			200	0.845356	0.00893453	0.845922	0.00909332	0.84411	0.00859534	0.84302	0.00830997
	500	0.765398	0.000934286	0.766564	0.000962721	0.766125	0.0009519	0.766036	0.000949731			500	0.844194	0.00861761	0.844462	0.00868964	0.843698	0.00848606	0.842568	0.00819461			500	0.765398	0.000934286	0.766564	0.000962721	0.766125	0.0009519	0.766036	0.000949731			500	0.844194	0.00861761	0.844462	0.00868964	0.843698	0.00848606	0.842568	0.00819461
	1000	0.766276	0.000955605	0.766497	0.000961066	0.76605	0.000950083	0.766002	0.000948889			1000	0.845155	0.00887893	0.844317	0.00865076	0.843723	0.00849286	0.84257	0.00819516			1000	0.766276	0.000955605	0.766497	0.000961066	0.76605	0.000950083	0.766002	0.000948889			1000	0.845155	0.00887893	0.844317	0.00865076	0.843723	0.00849286	0.84257	0.00819516
MovAvg	-	0.765743	0.000942592	0.765817	0.000944398	0.765867	0.000945606	-	-		MovAvg	-	0.842355	0.00814081	0.842365	0.00814342	0.842353	0.00814031	-	-		MovAvg	-	0.765743	0.000942592	0.765817	0.000944398	0.765867	0.000945606	-	-		MovAvg	-	0.842355	0.00814081	0.842365	0.00814342	0.842353	0.00814031	-	-
Amplitude 3
BP
HbO2C		0.01-0.09		0.01-0.2		0.01-0.3		0.01-0.5			HbRC		0.01-0.09		0.01-0.2		0.01-0.3		0.01-0.5			HbO2OD		0.01-0.09		0.01-0.2		0.01-0.3		0.01-0.5			HbROD		0.01-0.09		0.01-0.2		0.01-0.3		0.01-0.5
		W(18)	p	W(18)	p	W(18)	p	W(18)	p				W(18)	p	W(18)	p	W(18)	p	W(18)	p				W(18)	p	W(18)	p	W(18)	p	W(18)	p				W(18)	p	W(18)	p	W(18)	p	W(18)	p
BW	3	0.94499	0.351891	0.95613	0.528981	0.955337	0.514708	0.954701	0.503408		BW	3	0.922537	0.14336	0.921392	0.136824	0.920059	0.129581	0.9186	0.122096		BW	3	0.94499	0.351891	0.95613	0.528981	0.955337	0.514708	0.954701	0.503408		BW	3	0.922537	0.14336	0.921392	0.136824	0.920059	0.129581	0.9186	0.122096
	4	0.949	0.409544	0.955399	0.515815	0.952614	0.46748	0.952607	0.467364			4	0.931649	0.207578	0.93115	0.20344	0.930127	0.195189	0.928962	0.186192			4	0.949	0.409544	0.955399	0.515815	0.952614	0.46748	0.952607	0.467364			4	0.931649	0.207578	0.93115	0.20344	0.930127	0.195189	0.928962	0.186192
	5	-	-	0.950636	0.435082	0.94888	0.407717	0.944799	0.349325			5	-	-	0.938109	0.268903	0.931663	0.207696	0.929319	0.188907			5	-	-	0.950636	0.435082	0.94888	0.407717	0.944799	0.349325			5	-	-	0.938109	0.268903	0.931663	0.207696	0.929319	0.188907
	20	-	-	-	-	-	-	-	-			20	-	-	-	-	-	-	-	-			20	-	-	-	-	-	-	-	-			20	-	-	-	-	-	-	-	-
	100	-	-	-	-	-	-	-	-			100	-	-	-	-	-	-	-	-			100	-	-	-	-	-	-	-	-			100	-	-	-	-	-	-	-	-
	200	-	-	-	-	-	-	-	-			200	-	-	-	-	-	-	-	-			200	-	-	-	-	-	-	-	-			200	-	-	-	-	-	-	-	-
	500	-	-	-	-	-	-	-	-			500	-	-	-	-	-	-	-	-			500	-	-	-	-	-	-	-	-			500	-	-	-	-	-	-	-	-
	1000	-	-	-	-	-	-	-	-			1000	-	-	-	-	-	-	-	-			1000	-	-	-	-	-	-	-	-			1000	-	-	-	-	-	-	-	-
FIR	3	0.835311	0.00656225	0.835311	0.00656235	0.835312	0.00656251	0.835315	0.006563		FIR	3	0.80784	0.00293422	0.80784	0.00293422	0.80784	0.00293423	0.807841	0.00293423		FIR	3	0.835311	0.00656225	0.835311	0.00656235	0.835312	0.00656251	0.835315	0.006563		FIR	3	0.80784	0.00293422	0.80784	0.00293422	0.80784	0.00293423	0.807841	0.00293423
	4	0.835254	0.0065509	0.835255	0.0065512	0.835258	0.00655168	0.835265	0.00655315			4	0.807837	0.0029339	0.807837	0.00293391	0.807837	0.00293393	0.807838	0.00293399			4	0.835254	0.0065509	0.835255	0.0065512	0.835258	0.00655168	0.835265	0.00655315			4	0.807837	0.0029339	0.807837	0.00293391	0.807837	0.00293393	0.807838	0.00293399
	5	0.835185	0.00653731	0.835189	0.00653801	0.835194	0.00653908	0.835211	0.0065424			5	0.807825	0.00293298	0.807826	0.00293303	0.807827	0.00293311	0.80783	0.00293335			5	0.835185	0.00653731	0.835189	0.00653801	0.835194	0.00653908	0.835211	0.0065424			5	0.807825	0.00293298	0.807826	0.00293303	0.807827	0.00293311	0.80783	0.00293335
	20	0.83293	0.00610655	0.833454	0.00620376	0.834163	0.00633809	0.835326	0.00656517			20	0.806962	0.00286223	0.807238	0.0028846	0.807565	0.00291143	0.807966	0.00294468			20	0.83293	0.00610655	0.833454	0.00620376	0.834163	0.00633809	0.835326	0.00656517			20	0.806962	0.00286223	0.807238	0.0028846	0.807565	0.00291143	0.807966	0.00294468
	100	0.835793	0.00665888	0.84832	0.00980139	0.848417	0.00983122	0.848273	0.00978699			100	0.814717	0.00357088	0.821136	0.00430229	0.82058	0.00423293	0.819958	0.00415671			100	0.835793	0.00665888	0.84832	0.00980139	0.848417	0.00983122	0.848273	0.00978699			100	0.814717	0.00357088	0.821136	0.00430229	0.82058	0.00423293	0.819958	0.00415671
	200	0.908936	0.0770159	0.912265	0.0870524	0.911571	0.0848528	0.911135	0.0835002			200	0.902857	0.0617209	0.901792	0.05939	0.900992	0.0577035	0.900155	0.0559927			200	0.908936	0.0770159	0.912265	0.0870524	0.911571	0.0848528	0.911135	0.0835002			200	0.902857	0.0617209	0.901792	0.05939	0.900992	0.0577035	0.900155	0.0559927
	500	0.942989	0.325729	0.945185	0.354536	0.945134	0.353844	0.945072	0.353008			500	0.950179	0.427836	0.95102	0.441248	0.951456	0.448319	0.951649	0.451476			500	0.942989	0.325729	0.945185	0.354536	0.945134	0.353844	0.945072	0.353008			500	0.950179	0.427836	0.95102	0.441248	0.951456	0.448319	0.951649	0.451476
	1000	0.940308	0.293316	0.941124	0.302874	0.941209	0.303881	0.94131	0.305091			1000	0.941429	0.306515	0.943561	0.333031	0.943931	0.337839	0.943951	0.338102			1000	0.940308	0.293316	0.941124	0.302874	0.941209	0.303881	0.94131	0.305091			1000	0.941429	0.306515	0.943561	0.333031	0.943931	0.337839	0.943951	0.338102
LP
HbO2C		0.09		0.1		0.14		0.5			HbRC		0.09		0.1		0.14		0.5			HbO2OD		0.09		0.1		0.14		0.5			HbROD		0.09		0.1		0.14		0.5
		W(18)	p	W(18)	p	W(18)	p	W(18)	p				W(18)	p	W(18)	p	W(18)	p	W(18)	p				W(18)	p	W(18)	p	W(18)	p	W(18)	p				W(18)	p	W(18)	p	W(18)	p	W(18)	p
BW	3	0.834482	0.00639948	0.834732	0.00644819	0.834978	0.00649647	0.83537	0.00657407		BW	3	0.80875	0.00301091	0.808724	0.00300868	0.80865	0.00300236	0.80792	0.00294082		BW	3	0.834482	0.00639948	0.834732	0.00644819	0.834978	0.00649647	0.83537	0.00657407		BW	3	0.80875	0.00301091	0.808724	0.00300868	0.80865	0.00300236	0.80792	0.00294082
	4	0.83529	0.00655818	0.83533	0.00656608	0.835044	0.00650929	0.835369	0.00657389			4	0.808615	0.00299933	0.808499	0.00298948	0.808609	0.00299885	0.807917	0.00294056			4	0.83529	0.00655818	0.83533	0.00656608	0.835044	0.00650929	0.835369	0.00657389			4	0.808615	0.00299933	0.808499	0.00298948	0.808609	0.00299885	0.807917	0.00294056
	5	0.836219	0.0067457	0.836014	0.00670376	0.835136	0.00652751	0.835369	0.00657376			5	0.808756	0.00301142	0.808511	0.0029905	0.808679	0.00300481	0.807916	0.0029405			5	0.836219	0.0067457	0.836014	0.00670376	0.835136	0.00652751	0.835369	0.00657376			5	0.808756	0.00301142	0.808511	0.0029905	0.808679	0.00300481	0.807916	0.0029405
	20	-	-	-	-	-	-	0.835368	0.00657356			20	-	-	-	-	-	-	0.807917	0.00294061			20	-	-	-	-	-	-	0.835368	0.00657356			20	-	-	-	-	-	-	0.807917	0.00294061
	100	-	-	-	-	-	-	-	-			100	-	-	-	-	-	-	-	-			100	-	-	-	-	-	-	-	-			100	-	-	-	-	-	-	-	-
	200	-	-	-	-	-	-	-	-			200	-	-	-	-	-	-	-	-			200	-	-	-	-	-	-	-	-			200	-	-	-	-	-	-	-	-
	500	-	-	-	-	-	-	-	-			500	-	-	-	-	-	-	-	-			500	-	-	-	-	-	-	-	-			500	-	-	-	-	-	-	-	-
	1000	-	-	-	-	-	-	-	-			1000	-	-	-	-	-	-	-	-			1000	-	-	-	-	-	-	-	-			1000	-	-	-	-	-	-	-	-
FIR	3	0.835311	0.00656224	0.835311	0.00656225	0.835311	0.00656228	0.835315	0.00656299		FIR	3	0.80784	0.00293422	0.80784	0.00293422	0.80784	0.00293422	0.807841	0.00293423		FIR	3	0.835311	0.00656224	0.835311	0.00656225	0.835311	0.00656228	0.835315	0.00656299		FIR	3	0.80784	0.00293422	0.80784	0.00293422	0.80784	0.00293422	0.807841	0.00293423
	4	0.835254	0.00655089	0.835254	0.0065509	0.835254	0.00655099	0.835265	0.0065531			4	0.807837	0.0029339	0.807837	0.0029339	0.807837	0.0029339	0.807838	0.00293399			4	0.835254	0.00655089	0.835254	0.0065509	0.835254	0.00655099	0.835265	0.0065531			4	0.807837	0.0029339	0.807837	0.0029339	0.807837	0.0029339	0.807838	0.00293399
	5	0.835185	0.00653729	0.835185	0.00653733	0.835186	0.00653753	0.83521	0.00654229			5	0.807825	0.00293297	0.807825	0.00293298	0.807826	0.00293299	0.80783	0.00293335			5	0.835185	0.00653729	0.835185	0.00653733	0.835186	0.00653753	0.83521	0.00654229			5	0.807825	0.00293297	0.807825	0.00293298	0.807826	0.00293299	0.80783	0.00293335
	20	0.832912	0.00610325	0.832944	0.00610913	0.833099	0.00613773	0.835212	0.00654264			20	0.806953	0.00286146	0.80697	0.00286284	0.807054	0.00286962	0.807915	0.00294039			20	0.832912	0.00610325	0.832944	0.00610913	0.833099	0.00613773	0.835212	0.00654264			20	0.806953	0.00286146	0.80697	0.00286284	0.807054	0.00286962	0.807915	0.00294039
	100	0.826484	0.0050362	0.830022	0.00559596	0.834627	0.00642764	0.83566	0.00663209			100	0.804006	0.00263357	0.807399	0.00289775	0.809207	0.00305017	0.808305	0.00297306			100	0.826484	0.0050362	0.830022	0.00559596	0.834627	0.00642764	0.83566	0.00663209			100	0.804006	0.00263357	0.807399	0.00289775	0.809207	0.00305017	0.808305	0.00297306
	200	0.833452	0.00620347	0.835282	0.00655657	0.835345	0.006569	0.8357	0.00664017			200	0.811371	0.00324412	0.811379	0.00324488	0.809361	0.00306357	0.808327	0.00297497			200	0.833452	0.00620347	0.835282	0.00655657	0.835345	0.006569	0.8357	0.00664017			200	0.811371	0.00324412	0.811379	0.00324488	0.809361	0.00306357	0.808327	0.00297497
	500	0.834132	0.00633212	0.835699	0.00664009	0.835354	0.00657075	0.835484	0.00659672			500	0.810019	0.00312145	0.809819	0.00310378	0.808903	0.00302398	0.807968	0.00294484			500	0.834132	0.00633212	0.835699	0.00664009	0.835354	0.00657075	0.835484	0.00659672			500	0.810019	0.00312145	0.809819	0.00310378	0.808903	0.00302398	0.807968	0.00294484
	1000	0.835337	0.00656746	0.835572	0.00661435	0.835229	0.006546	0.835438	0.00658766			1000	0.810522	0.0031665	0.809723	0.00309525	0.808949	0.00302795	0.807963	0.00294446			1000	0.835337	0.00656746	0.835572	0.00661435	0.835229	0.006546	0.835438	0.00658766			1000	0.810522	0.0031665	0.809723	0.00309525	0.808949	0.00302795	0.807963	0.00294446
MovAvg	-	0.835041	0.00650871	0.835171	0.00653445	0.835271	0.0065543	-	-		MovAvg	-	0.807794	0.00293033	0.807827	0.00293308	0.807842	0.00293431	-	-		MovAvg	-	0.835041	0.00650871	0.835171	0.00653445	0.835271	0.0065543	-	-		MovAvg	-	0.807794	0.00293033	0.807827	0.00293308	0.807842	0.00293431	-	-
