# Supplementary material for: Current Status and Issues Regarding Pre-processing of fNIRS Neuroimaging Data: An Investigation of Diverse Signal Filtering Methods Within a General Linear Model Framework
Source: Front Hum Neurosci. 2019 Jan 11;12:505. doi: 10.3389/fnhum.2018.00505 (PMC6336925; doi:10.3389/fnhum.2018.00505)
Supplement: Supplementary file 3 [file Table_3.XLSX]

## Sheet: Amplitude 1
BP
HbO2C																				HbRC
		0.01-0.09				0.01-0.2				0.01-0.3				0.01-0.5								0.01-0.09				0.01-0.2				0.01-0.3				0.01-0.5
		BW		FIR		BW		FIR		BW		FIR		BW		FIR						BW		FIR		BW		FIR		BW		FIR		BW		FIR
		t(17)	p	t(17)	p	t(17)	p	t(17)	p	t(17)	p	t(17)	p	t(17)	p	t(17)	p					t(17)	p	t(17)	p	t(17)	p	t(17)	p	t(17)	p	t(17)	p	t(17)	p	t(17)	p
No Correction	3	-6.04288	1.31794e-05	0.879882	0.391192	-5.78593	2.19302e-05	0.945524	0.357638	-5.77051	2.2617e-05	1.0432	0.311462	-5.78828	2.18274e-05	1.33294	0.200142			No Correction	3	5.95037	1.58153e-05	-3.1162	0.00628254	5.56638	3.41148e-05	-3.17837	0.0054974	5.59505	3.21912e-05	-3.27089	0.00450429	5.61743	3.07671e-05	-3.54533	0.00248714
	4	-6.18511	9.97966e-06	0.89064	0.385554	-5.90074	1.74488e-05	1.00443	0.329254	-5.88652	1.79481e-05	1.17069	0.257873	-5.92182	1.67348e-05	1.64108	0.11915				4	6.16762	1.03253e-05	-3.12521	0.00616228	5.84947	1.93202e-05	-3.23298	0.00488783	5.842	1.96094e-05	-3.39045	0.00347893	5.79743	2.1432e-05	-3.836	0.00132328
	5	-	-	0.903574	0.378848	-5.76077	2.30619e-05	1.07442	0.297647	-5.8558	1.90782e-05	1.31858	0.2048	-5.86217	1.8838e-05	1.97091	0.0652403				5	-	-	-3.13622	0.00601846	5.74793	2.36626e-05	-3.29801	0.00424829	5.74452	2.38251e-05	-3.52924	0.00257546	5.70444	2.582e-05	-4.14712	0.000674398
	20	-	-	1.35973	0.191678	-	-	2.87964	0.0104015	-	-	3.61073	0.00215805	-	-	2.23015	0.0395053				20	-	-	-3.54148	0.00250798	-	-	-4.97873	0.000114567	-	-	-5.67884	2.71841e-05	-	-	-4.3926	0.000397446
	100	-	-	1.32166	0.203792	-	-	-4.9521	0.000121145	-	-	-4.99237	0.000111343	-	-	-4.98264	0.000113633				100	-	-	-3.50217	0.00273118	-	-	2.52499	0.021802	-	-	2.56066	0.0202602	-	-	2.54593	0.0208839
	200	-	-	-9.33785	4.18554e-08	-	-	-9.34387	4.14694e-08	-	-	-9.38269	3.90693e-08	-	-	-9.439	3.58429e-08				200	-	-	8.51199	1.55273e-07	-	-	8.57171	1.40841e-07	-	-	8.60416	1.33595e-07	-	-	8.66227	1.21576e-07
	500	-	-	-6.40965	6.46916e-06	-	-	-6.51431	5.29797e-06	-	-	-6.51103	5.33109e-06	-	-	-6.51173	5.32404e-06				500	-	-	6.23432	9.06988e-06	-	-	6.31761	7.72085e-06	-	-	6.3097	7.83943e-06	-	-	6.30709	7.87898e-06
	1000	-	-	-5.41279	4.66383e-05	-	-	-5.54961	3.52949e-05	-	-	-5.54184	3.58553e-05	-	-	-5.53407	3.64253e-05				1000	-	-	4.71161	0.000201188	-	-	4.8409	0.000153061	-	-	4.82521	0.000158212	-	-	4.81455	0.00016181
Down-sampling	3	-6.5371	5.07349e-06	0.721437	0.480446	-6.30268	7.94641e-06	0.785081	0.44321	-6.28729	8.18614e-06	0.879785	0.391243	-6.30402	7.92591e-06	1.16067	0.261818			Down-sampling	3	6.68028	3.87153e-06	-3.0406	0.00738608	6.34006	7.39396e-06	-3.10253	0.00646935	6.37052	6.97332e-06	-3.1947	0.00530776	6.38989	6.71883e-06	-3.4681	0.00294048
	4	-6.76519	3.30237e-06	0.732345	0.473935	-6.48695	5.5811e-06	0.842776	0.411055	-6.48638	5.58713e-06	1.00411	0.329404	-6.54211	5.02545e-06	1.46051	0.162384				4	6.89926	2.57427e-06	-3.03747	0.00743567	6.59489	4.54741e-06	-3.14491	0.00590716	6.60539	4.45808e-06	-3.30192	0.0042126	6.54117	5.03444e-06	-3.74629	0.00160782
	5	-	-	0.745065	0.466409	-6.37475	6.917e-06	0.910964	0.375051	-6.48036	5.65161e-06	1.14803	0.266856	-6.48433	5.609e-06	1.78131	0.0927357				5	-	-	-3.04005	0.00739475	6.52586	5.18289e-06	-3.20134	0.00523249	6.53332	5.11003e-06	-3.43188	0.00318052	6.496	5.48579e-06	-4.04824	0.000835213
	20	-	-	1.1941	0.248837	-	-	2.66958	0.0161687	-	-	3.37761	0.00357691	-	-	2.0328	0.0579949				20	-	-	-3.44756	0.00307428	-	-	-4.87635	0.000142047	-	-	-5.57002	3.38641e-05	-	-	-4.28182	0.000504333
	100	-	-	1.15752	0.263066	-	-	-4.97323	0.000115895	-	-	-5.0124	0.000106773	-	-	-5.00138	0.000109262				100	-	-	-3.40753	0.0033527	-	-	2.63217	0.0174758	-	-	2.66961	0.0161676	-	-	2.65668	0.0166085
	200	-	-	-9.32369	4.27783e-08	-	-	-9.29079	4.50045e-08	-	-	-9.32843	4.24668e-08	-	-	-9.3799	3.92368e-08				200	-	-	8.71502	1.11645e-07	-	-	8.81316	9.53613e-08	-	-	8.84104	9.12033e-08	-	-	8.88992	8.43667e-08
	500	-	-	-6.87209	2.70699e-06	-	-	-6.97982	2.21903e-06	-	-	-6.97742	2.22884e-06	-	-	-6.97322	2.2461e-06				500	-	-	6.87434	2.69573e-06	-	-	6.97299	2.24706e-06	-	-	6.96362	2.28613e-06	-	-	6.96618	2.27537e-06
	1000	-	-	-5.88381	1.8045e-05	-	-	-6.02102	1.37583e-05	-	-	-6.01647	1.38819e-05	-	-	-6.00747	1.41303e-05				1000	-	-	5.31136	5.74262e-05	-	-	5.45744	4.25735e-05	-	-	5.44394	4.37622e-05	-	-	5.4391	4.41968e-05
Precoloring	3	-5.11646	8.59443e-05	0.804327	0.432313	-5.0954	8.97944e-05	0.87938	0.391457	-5.09208	9.04161e-05	0.991064	0.335552	-5.11109	8.69093e-05	1.32233	0.203574			Precoloring	3	4.94407	0.000123202	-3.04566	0.00730674	4.81788	0.000160676	-3.11908	0.00624386	4.85223	0.000149447	-3.22834	0.00493697	4.88043	0.000140832	-3.55242	0.00244914
	4	-5.32148	5.62438e-05	0.817231	0.425102	-5.22446	6.86999e-05	0.94733	0.356744	-5.22054	6.92586e-05	1.13741	0.271145	-5.2518	6.4926e-05	1.6752	0.11219				4	5.14711	8.064e-05	-3.05767	0.00712154	5.06002	9.66644e-05	-3.18493	0.00542045	5.04623	9.9486e-05	-3.37087	0.00362943	5.01078	0.000107134	-3.89698	0.00115928
	5	-	-	0.832778	0.416517	-5.09192	9.04474e-05	1.0281	0.318312	-5.19837	7.25103e-05	1.30721	0.208546	-5.19698	7.27183e-05	2.05293	0.0558				5	-	-	-3.07221	0.0069034	4.96161	0.000118751	-3.26325	0.00457914	4.98488	0.000113101	-3.53627	0.00253647	4.93706	0.000125027	-4.26576	0.000522082
	20	-	-	1.38206	0.184845	-	-	3.11348	0.00631935	-	-	3.94074	0.00105428	-	-	2.34748	0.0312681				20	-	-	-3.58993	0.00225771	-	-	-5.28081	6.11551e-05	-	-	-6.09655	1.18626e-05	-	-	-4.55471	0.000280919
	100	-	-	1.42695	0.171702	-	-	-5.94676	1.59287e-05	-	-	-5.99369	1.45192e-05	-	-	-5.98234	1.48478e-05				100	-	-	-3.64893	0.0019863	-	-	3.70594	0.00175506	-	-	3.75151	0.00158969	-	-	3.73634	0.00164295
	200	-	-	-10.3721	9.03972e-09	-	-	-10.6286	6.28938e-09	-	-	-10.6739	5.90306e-09	-	-	-10.7369	5.40726e-09				200	-	-	10.0929	1.35172e-08	-	-	10.4764	7.79403e-09	-	-	10.5196	7.33181e-09	-	-	10.5887	6.65158e-09
	500	-	-	-5.75715	2.323e-05	-	-	-5.92717	1.65583e-05	-	-	-5.92648	1.65809e-05	-	-	-5.92731	1.65537e-05				500	-	-	5.35669	5.23192e-05	-	-	5.55542	3.48809e-05	-	-	5.54871	3.53593e-05	-	-	5.54762	3.54371e-05
	1000	-	-	-4.73103	0.000193074	-	-	-4.92834	0.000127338	-	-	-4.92446	0.00012838	-	-	-4.92032	0.0001295				1000	-	-	4.01097	0.00090542	-	-	4.24234	0.000549118	-	-	4.23221	0.000561243	-	-	4.22382	0.00057148
HbO2OD																				HbROD
		0.01-0.09				0.01-0.2				0.01-0.3				0.01-0.5								0.01-0.09				0.01-0.2				0.01-0.3				0.01-0.5
		BW		FIR		BW		FIR		BW		FIR		BW		FIR						BW		FIR		BW		FIR		BW		FIR		BW		FIR
		t(17)	p	t(17)	p	t(17)	p	t(17)	p	t(17)	p	t(17)	p	t(17)	p	t(17)	p					t(17)	p	t(17)	p	t(17)	p	t(17)	p	t(17)	p	t(17)	p	t(17)	p	t(17)	p
No Correction	3	-6.04288	1.31794e-05	0.879882	0.391192	-5.78593	2.19302e-05	0.945524	0.357638	-5.77051	2.2617e-05	1.0432	0.311462	-5.78828	2.18274e-05	1.33294	0.200142			No Correction	3	5.95037	1.58153e-05	-3.1162	0.00628254	5.56638	3.41148e-05	-3.17837	0.0054974	5.59505	3.21912e-05	-3.27089	0.00450429	5.61743	3.07671e-05	-3.54533	0.00248714
	4	-6.18529	9.97625e-06	0.89064	0.385554	-5.90074	1.74489e-05	1.00443	0.329254	-5.88653	1.7948e-05	1.17069	0.257873	-5.92182	1.67348e-05	1.64108	0.11915				4	6.16751	1.03277e-05	-3.12521	0.00616228	5.84946	1.93204e-05	-3.23298	0.00488783	5.842	1.96093e-05	-3.39045	0.00347893	5.79743	2.1432e-05	-3.836	0.00132328
	5	-	-	0.903574	0.378848	-5.76057	2.30714e-05	1.07442	0.297647	-5.85676	1.90416e-05	1.31858	0.2048	-5.86214	1.88391e-05	1.97091	0.0652403				5	-	-	-3.13622	0.00601846	5.75059	2.3537e-05	-3.29801	0.00424829	5.74462	2.38202e-05	-3.52924	0.00257546	5.70442	2.58211e-05	-4.14712	0.000674398
	20	-	-	1.35973	0.191678	-	-	2.87964	0.0104015	-	-	3.61073	0.00215805	-	-	2.23015	0.0395053				20	-	-	-3.54148	0.00250798	-	-	-4.97873	0.000114567	-	-	-5.67884	2.71841e-05	-	-	-4.3926	0.000397446
	100	-	-	1.32166	0.203792	-	-	-4.9521	0.000121145	-	-	-4.99237	0.000111343	-	-	-4.98264	0.000113633				100	-	-	-3.50217	0.00273118	-	-	2.52499	0.021802	-	-	2.56066	0.0202602	-	-	2.54593	0.0208839
	200	-	-	-9.33785	4.18554e-08	-	-	-9.34387	4.14694e-08	-	-	-9.38269	3.90693e-08	-	-	-9.439	3.58429e-08				200	-	-	8.51199	1.55273e-07	-	-	8.57171	1.40841e-07	-	-	8.60416	1.33595e-07	-	-	8.66227	1.21576e-07
	500	-	-	-6.40965	6.46916e-06	-	-	-6.51431	5.29797e-06	-	-	-6.51103	5.33109e-06	-	-	-6.51173	5.32404e-06				500	-	-	6.23432	9.06988e-06	-	-	6.31761	7.72085e-06	-	-	6.3097	7.83943e-06	-	-	6.30709	7.87898e-06
	1000	-	-	-5.41279	4.66383e-05	-	-	-5.54961	3.52949e-05	-	-	-5.54184	3.58553e-05	-	-	-5.53407	3.64253e-05				1000	-	-	4.71161	0.000201188	-	-	4.8409	0.000153061	-	-	4.82521	0.000158212	-	-	4.81455	0.00016181
Down-sampling	3	-6.5371	5.07349e-06	0.721437	0.480446	-6.30268	7.94641e-06	0.785081	0.44321	-6.28729	8.18614e-06	0.879785	0.391243	-6.30402	7.92591e-06	1.16067	0.261818			Down-sampling	3	6.68028	3.87153e-06	-3.0406	0.00738608	6.34006	7.39396e-06	-3.10253	0.00646935	6.37052	6.97332e-06	-3.1947	0.00530776	6.38989	6.71883e-06	-3.4681	0.00294048
	4	-6.76541	3.30104e-06	0.732345	0.473935	-6.48695	5.58111e-06	0.842776	0.411055	-6.48639	5.58711e-06	1.00411	0.329404	-6.54211	5.02545e-06	1.46051	0.162384				4	6.89928	2.57414e-06	-3.03747	0.00743567	6.59489	4.54743e-06	-3.14491	0.00590716	6.6054	4.45806e-06	-3.30192	0.0042126	6.54117	5.03445e-06	-3.74629	0.00160782
	5	-	-	0.745065	0.466409	-6.37659	6.8926e-06	0.910964	0.375051	-6.482	5.634e-06	1.14803	0.266856	-6.48432	5.60911e-06	1.78131	0.0927357				5	-	-	-3.04005	0.00739475	6.52373	5.20393e-06	-3.20134	0.00523249	6.53308	5.11238e-06	-3.43188	0.00318052	6.49595	5.48629e-06	-4.04824	0.000835213
	20	-	-	1.1941	0.248837	-	-	2.66958	0.0161687	-	-	3.37761	0.00357691	-	-	2.0328	0.0579949				20	-	-	-3.44756	0.00307428	-	-	-4.87635	0.000142047	-	-	-5.57002	3.38641e-05	-	-	-4.28182	0.000504333
	100	-	-	1.15752	0.263066	-	-	-4.97323	0.000115895	-	-	-5.0124	0.000106773	-	-	-5.00138	0.000109262				100	-	-	-3.40753	0.0033527	-	-	2.63217	0.0174758	-	-	2.66961	0.0161676	-	-	2.65668	0.0166085
	200	-	-	-9.32369	4.27783e-08	-	-	-9.29079	4.50045e-08	-	-	-9.32843	4.24668e-08	-	-	-9.3799	3.92368e-08				200	-	-	8.71502	1.11645e-07	-	-	8.81316	9.53613e-08	-	-	8.84104	9.12033e-08	-	-	8.88992	8.43667e-08
	500	-	-	-6.87209	2.70699e-06	-	-	-6.97982	2.21903e-06	-	-	-6.97742	2.22884e-06	-	-	-6.97322	2.2461e-06				500	-	-	6.87434	2.69573e-06	-	-	6.97299	2.24706e-06	-	-	6.96362	2.28613e-06	-	-	6.96618	2.27537e-06
	1000	-	-	-5.88381	1.8045e-05	-	-	-6.02102	1.37583e-05	-	-	-6.01647	1.38819e-05	-	-	-6.00747	1.41303e-05				1000	-	-	5.31136	5.74262e-05	-	-	5.45744	4.25735e-05	-	-	5.44394	4.37622e-05	-	-	5.4391	4.41968e-05
Precoloring	3	-5.11646	8.59443e-05	0.804327	0.432313	-5.0954	8.97944e-05	0.87938	0.391457	-5.09208	9.04161e-05	0.991064	0.335552	-5.11109	8.69093e-05	1.32233	0.203574			Precoloring	3	4.94407	0.000123202	-3.04566	0.00730674	4.81788	0.000160676	-3.11908	0.00624386	4.85223	0.000149447	-3.22834	0.00493697	4.88043	0.000140832	-3.55242	0.00244914
	4	-5.32162	5.62273e-05	0.817231	0.425102	-5.22445	6.87001e-05	0.94733	0.356744	-5.22054	6.92584e-05	1.13741	0.271145	-5.2518	6.4926e-05	1.6752	0.11219				4	5.14703	8.06545e-05	-3.05767	0.00712154	5.06002	9.6664e-05	-3.18493	0.00542045	5.04623	9.94858e-05	-3.37087	0.00362943	5.01078	0.000107134	-3.89698	0.00115928
	5	-	-	0.832778	0.416517	-5.09001	9.08079e-05	1.0281	0.318312	-5.20002	7.22625e-05	1.30721	0.208546	-5.19696	7.27209e-05	2.05293	0.0558				5	-	-	-3.07221	0.0069034	4.9683	0.000117098	-3.26325	0.00457914	4.98616	0.000112798	-3.53627	0.00253647	4.93707	0.000125025	-4.26576	0.000522082
	20	-	-	1.38206	0.184845	-	-	3.11348	0.00631935	-	-	3.94074	0.00105428	-	-	2.34748	0.0312681				20	-	-	-3.58993	0.00225771	-	-	-5.28081	6.11551e-05	-	-	-6.09655	1.18626e-05	-	-	-4.55471	0.000280919
	100	-	-	1.42695	0.171702	-	-	-5.94676	1.59287e-05	-	-	-5.99369	1.45192e-05	-	-	-5.98234	1.48478e-05				100	-	-	-3.64893	0.0019863	-	-	3.70594	0.00175506	-	-	3.75151	0.00158969	-	-	3.73634	0.00164295
	200	-	-	-10.3721	9.03972e-09	-	-	-10.6286	6.28938e-09	-	-	-10.6739	5.90306e-09	-	-	-10.7369	5.40726e-09				200	-	-	10.0929	1.35172e-08	-	-	10.4764	7.79403e-09	-	-	10.5196	7.33181e-09	-	-	10.5887	6.65158e-09
	500	-	-	-5.75715	2.323e-05	-	-	-5.92717	1.65583e-05	-	-	-5.92648	1.65809e-05	-	-	-5.92731	1.65537e-05				500	-	-	5.35669	5.23192e-05	-	-	5.55542	3.48809e-05	-	-	5.54871	3.53593e-05	-	-	5.54762	3.54371e-05
	1000	-	-	-4.73103	0.000193074	-	-	-4.92834	0.000127338	-	-	-4.92446	0.00012838	-	-	-4.92032	0.0001295				1000	-	-	4.01097	0.00090542	-	-	4.24234	0.000549118	-	-	4.23221	0.000561243	-	-	4.22382	0.00057148
Comparison
HbO2C vs HbO2OD																				HbRC vs HbROD
		0.01-0.09				0.01-0.2				0.01-0.3				0.01-0.5								0.01-0.09				0.01-0.2				0.01-0.3				0.01-0.5
		BW		FIR		BW		FIR		BW		FIR		BW		FIR						BW		FIR		BW		FIR		BW		FIR		BW		FIR
		t(16)	p	t(16)	p	t(16)	p	t(16)	p	t(16)	p	t(16)	p	t(16)	p	t(16)	p					t(16)	p	t(16)	p	t(16)	p	t(16)	p	t(16)	p	t(16)	p	t(16)	p	t(16)	p
No Correction	3	2.90963e-08	1	0	1	1.3228e-10	1	0	1	-4.43297e-10	1	0	1	3.89403e-11	1	0	1			No Correction	3	-2.53501e-09	1	1.47976e-15	1	4.79307e-09	1	0	1	-7.74334e-10	1	2.91666e-15	1	-1.60578e-10	1	0	1
	4	9.47635e-05	0.999925	0	1	2.75771e-07	1	-2.08564e-15	1	8.06747e-07	0.999999	0	1	4.71841e-08	1	0	1				4	-3.47427e-05	0.999972	0	1	-3.46882e-06	0.999997	1.46278e-15	1	4.33226e-08	1	0	1	1.44645e-08	1	0	1
	5	-	-	0	1	0.00181836	0.99856	0	1	0.000659241	0.999478	0	1	3.70608e-06	0.999997	0	1				5	-	-	0	1	0.00178675	0.998585	1.45285e-15	1	1.4792e-05	0.999988	0	1	-3.05061e-06	0.999998	0	1
	20	-	-	0	1	-	-	0	1	-	-	1.58659e-15	1	-	-	1.85745e-15	1				20	-	-	0	1	-	-	-2.39494e-15	1	-	-	-2.21886e-15	1	-	-	0	1
	100	-	-	2.04526e-15	1	-	-	1.6796e-15	1	-	-	-3.36576e-15	1	-	-	0	1				100	-	-	0	1	-	-	-2.4417e-15	1	-	-	0	1	-	-	-3.66531e-15	1
	200	-	-	0	1	-	-	-2.51882e-15	1	-	-	-2.5196e-15	1	-	-	-2.52222e-15	1				200	-	-	0	1	-	-	2.22734e-15	1	-	-	0	1	-	-	0	1
	500	-	-	3.66119e-15	1	-	-	0	1	-	-	3.69862e-15	1	-	-	-7.39559e-15	1				500	-	-	6.73509e-15	1	-	-	-6.80743e-15	1	-	-	-3.40432e-15	1	-	-	0	1
	1000	-	-	-3.51976e-15	1	-	-	0	1	-	-	-3.55485e-15	1	-	-	0	1				1000	-	-	-5.75665e-15	1	-	-	0	1	-	-	1.16416e-14	1	-	-	0	1
Down-sampling	3	9.14125e-09	1	0	1	5.37823e-09	1	0	1	-1.0118e-09	1	-2.01585e-15	1	-1.74976e-10	1	0	1			Down-sampling	3	-2.0623e-09	1	-1.47069e-15	1	-4.63011e-10	1	0	1	-5.5477e-10	1	-1.44936e-15	1	-1.09176e-10	1	-2.82306e-15	1
	4	0.00013506	0.999893	0	1	1.23569e-06	0.999999	0	1	1.15137e-06	0.999999	0	1	-5.75238e-08	1	1.90838e-15	1				4	-3.18126e-05	0.999975	-1.46942e-15	1	-2.94337e-06	0.999998	0	1	-8.72159e-08	1	0	1	9.77271e-08	1	-1.37147e-15	1
	5	-	-	0	1	-5.20658e-05	0.999959	-1.00597e-15	1	0.00057459	0.999545	0	1	3.56006e-05	0.999972	-1.84892e-15	1				5	-	-	0	1	-0.00206794	0.998362	1.4451e-15	1	-0.000401807	0.999682	1.41326e-15	1	1.76836e-05	0.999986	0	1
	20	-	-	0	1	-	-	0	1	-	-	0	1	-	-	1.80452e-15	1				20	-	-	0	1	-	-	0	1	-	-	2.20871e-15	1	-	-	0	1
	100	-	-	0	1	-	-	0	1	-	-	0	1	-	-	1.63032e-15	1				100	-	-	0	1	-	-	3.63929e-15	1	-	-	0	1	-	-	-2.42536e-15	1
	200	-	-	0	1	-	-	0	1	-	-	-2.42974e-15	1	-	-	0	1				200	-	-	0	1	-	-	0	1	-	-	2.2093e-15	1	-	-	0	1
	500	-	-	0	1	-	-	0	1	-	-	-3.61801e-15	1	-	-	0	1				500	-	-	0	1	-	-	0	1	-	-	0	1	-	-	0	1
	1000	-	-	0	1	-	-	-3.48255e-15	1	-	-	0	1	-	-	3.48152e-15	1				1000	-	-	0	1	-	-	0	1	-	-	5.71285e-15	1	-	-	0	1
Precoloring	3	3.28881e-08	1	0	1	1.23375e-09	1	0	1	-3.77219e-10	1	0	1	1.24712e-10	1	0	1			Precoloring	3	-1.9337e-08	1	0	1	4.7609e-09	1	0	1	-1.51796e-09	1	0	1	-7.35671e-11	1	0	1
	4	9.05712e-05	0.999928	0	1	3.04105e-06	0.999998	2.38482e-15	1	7.75987e-07	0.999999	0	1	1.92633e-08	1	0	1				4	-5.42076e-05	0.999957	0	1	-1.88823e-06	0.999999	0	1	9.7217e-08	1	0	1	-8.49607e-10	1	0	1
	5	-	-	0	1	-0.00212524	0.998317	0	1	0.000828193	0.999344	0	1	1.25047e-05	0.99999	2.17748e-15	1				5	-	-	1.74264e-15	1	0.000876898	0.999305	1.7162e-15	1	-0.000497623	0.999606	0	1	-2.30852e-07	1	0	1
	20	-	-	0	1	-	-	0	1	-	-	0	1	-	-	-2.1239e-15	1				20	-	-	0	1	-	-	1.41546e-15	1	-	-	0	1	-	-	-1.53912e-15	1
	100	-	-	0	1	-	-	0	1	-	-	0	1	-	-	-1.91982e-15	1				100	-	-	-1.70164e-15	1	-	-	0	1	-	-	-2.87901e-15	1	-	-	0	1
	200	-	-	0	1	-	-	-2.81643e-15	1	-	-	0	1	-	-	-2.82023e-15	1				200	-	-	0	1	-	-	2.53962e-15	1	-	-	5.07786e-15	1	-	-	-2.54097e-15	1
	500	-	-	-7.49275e-15	1	-	-	0	1	-	-	0	1	-	-	0	1				500	-	-	0	1	-	-	0	1	-	-	0	1	-	-	0	1
	1000	-	-	0	1	-	-	3.61579e-15	1	-	-	-7.2317e-15	1	-	-	0	1				1000	-	-	0	1	-	-	1.19049e-14	1	-	-	0	1	-	-	-5.95363e-15	1

## Sheet: Amplitude 2
BP
HbO2C																				HbRC
		0.01-0.09				0.01-0.2				0.01-0.3				0.01-0.5								0.01-0.09				0.01-0.2				0.01-0.3				0.01-0.5
		BW		FIR		BW		FIR		BW		FIR		BW		FIR						BW		FIR		BW		FIR		BW		FIR		BW		FIR
		t(17)	p	t(17)	p	t(17)	p	t(17)	p	t(17)	p	t(17)	p	t(17)	p	t(17)	p					t(17)	p	t(17)	p	t(17)	p	t(17)	p	t(17)	p	t(17)	p	t(17)	p	t(17)	p
No Correction	3	-4.49997	0.000315769	0.768284	0.45286	-4.31547	0.000469094	0.810272	0.428981	-4.31363	0.000470956	0.872754	0.394958	-4.32665	0.00045795	1.05808	0.304822			No Correction	3	4.60898	0.000250227	-2.82262	0.0117329	4.3574	0.000428653	-2.86074	0.0108257	4.36141	0.000424982	-2.91747	0.00960032	4.36375	0.000422844	-3.08573	0.00670646
	4	-4.6886	0.000211255	0.775079	0.448941	-4.47913	0.000330166	0.847865	0.408292	-4.47728	0.000331481	0.954211	0.353349	-4.47948	0.000329924	1.2551	0.226423				4	4.85743	0.000147819	-2.82798	0.011601	4.62133	0.000243731	-2.89406	0.0100888	4.58695	0.000262251	-2.99061	0.00821759	4.53686	0.000291829	-3.26379	0.00457383
	5	-	-	0.783283	0.444237	-4.38253	0.000406134	0.892564	0.384552	-4.44157	0.000357822	1.04873	0.308983	-4.44635	0.000354177	1.46599	0.160902				5	-	-	-2.83454	0.0114416	4.49707	0.000317736	-2.93374	0.00927428	4.45013	0.000351316	-3.07552	0.00685461	4.40617	0.000386042	-3.45439	0.00302919
	20	-	-	1.07555	0.297158	-	-	2.04693	0.0564461	-	-	2.51434	0.0222835	-	-	1.6315	0.121169				20	-	-	-3.08074	0.00677849	-	-	-3.96231	0.00100612	-	-	-4.39177	0.000398156	-	-	-3.60403	0.00218965
	100	-	-	1.05892	0.304451	-	-	-2.98696	0.00828175	-	-	-3.0121	0.00784953	-	-	-3.00458	0.00797642				100	-	-	-3.03936	0.00740575	-	-	0.625712	0.539814	-	-	0.645454	0.52725	-	-	0.635587	0.533509
	200	-	-	-6.01901	1.38127e-05	-	-	-6.04071	1.32357e-05	-	-	-6.064	1.26441e-05	-	-	-6.09984	1.17866e-05				200	-	-	4.14574	0.000676414	-	-	4.1757	0.000634019	-	-	4.19251	0.000611429	-	-	4.22391	0.000571374
	500	-	-	-4.76813	0.000178489	-	-	-4.83405	0.000155289	-	-	-4.83403	0.000155296	-	-	-4.8357	0.000154747				500	-	-	4.38251	0.000406151	-	-	4.41234	0.000380961	-	-	4.39989	0.000391276	-	-	4.39489	0.000395498
	1000	-	-	-4.06537	0.000804818	-	-	-4.16214	0.000652862	-	-	-4.15828	0.000658336	-	-	-4.1544	0.000663876				1000	-	-	3.40319	0.00338437	-	-	3.46816	0.0029401	-	-	3.45186	0.00304582	-	-	3.44309	0.00310425
Down-sampling	3	-4.84719	0.000151044	0.660839	0.517572	-4.67777	0.00021617	0.701492	0.492488	-4.66908	0.000220198	0.761986	0.456511	-4.68136	0.000214527	0.941399	0.359687			Down-sampling	3	5.18046	7.52507e-05	-2.77725	0.0129082	4.94278	0.000123537	-2.8152	0.0119177	4.96517	0.000117869	-2.87168	0.0105782	4.96237	0.000118564	-3.03925	0.00740743
	4	-5.07753	9.31997e-05	0.66831	0.512908	-4.87826	0.000141477	0.738861	0.470071	-4.88818	0.000138553	0.841932	0.411514	-4.91709	0.000130382	1.13349	0.27274				4	5.47054	4.14513e-05	-2.77308	0.013022	5.24218	6.6229e-05	-2.83891	0.0113367	5.22105	6.91861e-05	-2.93511	0.00924736	5.18067	7.52183e-05	-3.20744	0.00516421
	5	-	-	0.676785	0.507648	-4.77702	0.000175164	0.782787	0.444521	-4.84788	0.000150824	0.934255	0.363254	-4.86757	0.000144696	1.33885	0.19825				5	-	-	-2.77325	0.0130173	5.18709	7.42236e-05	-2.87205	0.01057	5.14942	8.02552e-05	-3.01328	0.00782977	5.09397	9.00611e-05	-3.39094	0.00347523
	20	-	-	0.965762	0.347702	-	-	1.90803	0.0734229	-	-	2.36019	0.0304786	-	-	1.50013	0.151924				20	-	-	-3.02147	0.00769416	-	-	-3.89643	0.00116065	-	-	-4.32133	0.000463216	-	-	-3.5328	0.00255565
	100	-	-	0.948995	0.35592	-	-	-3.0026	0.00801016	-	-	-3.02764	0.0075934	-	-	-3.02053	0.00770954				100	-	-	-2.98729	0.0082758	-	-	0.685844	0.502058	-	-	0.708291	0.488364	-	-	0.702078	0.492132
	200	-	-	-5.98179	1.4864e-05	-	-	-5.97382	1.50995e-05	-	-	-5.99729	1.44163e-05	-	-	-6.03026	1.35105e-05				200	-	-	4.24229	0.000549168	-	-	4.30823	0.000476464	-	-	4.32573	0.000458858	-	-	4.3574	0.000428653
	500	-	-	-5.0766	9.33802e-05	-	-	-5.14488	8.10153e-05	-	-	-5.14366	8.12198e-05	-	-	-5.14262	8.13967e-05				500	-	-	4.96293	0.000118425	-	-	5.05499	9.76841e-05	-	-	5.04479	9.97867e-05	-	-	5.04583	9.95693e-05
	1000	-	-	-4.3994	0.000391688	-	-	-4.49802	0.000317092	-	-	-4.49675	0.000317954	-	-	-4.49005	0.000322541				1000	-	-	3.91158	0.00112312	-	-	4.0162	0.000895223	-	-	4.00403	0.000919152	-	-	4.0022	0.00092279
Precoloring	3	-3.8215	0.00136561	0.737147	0.471085	-3.8119	0.00139435	0.785582	0.442924	-3.81401	0.00138799	0.857659	0.403011	-3.8246	0.00135645	1.07145	0.298945			Precoloring	3	3.83507	0.00132596	-2.71781	0.0146207	3.77644	0.00150594	-2.76209	0.0133258	3.79272	0.00145364	-2.82798	0.011601	3.80208	0.00142441	-3.02342	0.00766215
	4	-4.05312	0.000826438	0.745405	0.466209	-3.97738	0.000973794	0.829364	0.418392	-3.97903	0.000970313	0.952033	0.354421	-3.98218	0.000963705	1.2991	0.211254				4	4.05532	0.000822509	-2.72479	0.0144088	4.00492	0.000917377	-2.80154	0.0122655	3.97283	0.000983439	-2.91368	0.0096778	3.93163	0.00107533	-3.23095	0.00490925
	5	-	-	0.755376	0.460362	-3.87551	0.00121454	0.881422	0.390382	-3.94487	0.0010449	1.06155	0.30329	-3.93085	0.00107716	1.5428	0.14129				5	-	-	-2.73329	0.0141549	3.9179	0.00110783	-2.8485	0.0111093	3.90428	0.00114105	-3.01315	0.00783189	3.85674	0.00126505	-3.4531	0.00303763
	20	-	-	1.10905	0.282852	-	-	2.22582	0.0398446	-	-	2.75996	0.0133855	-	-	1.73278	0.101234				20	-	-	-3.04374	0.00733664	-	-	-4.06328	0.000808474	-	-	-4.55502	0.000280732	-	-	-3.62636	0.00208608
	100	-	-	1.14415	0.268417	-	-	-3.64527	0.00200217	-	-	-3.67531	0.00187573	-	-	-3.66691	0.00191026				100	-	-	-3.06877	0.00695442	-	-	1.35218	0.194034	-	-	1.37787	0.186112	-	-	1.36775	0.189201
	200	-	-	-6.79174	3.14282e-06	-	-	-6.97457	2.24056e-06	-	-	-7.0025	2.12852e-06	-	-	-7.04255	1.97793e-06				200	-	-	5.14935	8.0266e-05	-	-	5.364	5.15403e-05	-	-	5.38645	4.92222e-05	-	-	5.42402	4.558e-05
	500	-	-	-4.31338	0.000471208	-	-	-4.42698	0.000369193	-	-	-4.4284	0.000368069	-	-	-4.42924	0.000367405				500	-	-	3.83155	0.00133614	-	-	3.95883	0.00101375	-	-	3.95044	0.00103235	-	-	3.94838	0.00103697
	1000	-	-	-3.57829	0.00231546	-	-	-3.70812	0.00174677	-	-	-3.70656	0.0017527	-	-	-3.70422	0.00176163				1000	-	-	2.99725	0.00810199	-	-	3.13993	0.00597067	-	-	3.12738	0.00613374	-	-	3.11841	0.00625283
HbO2OD																				HbROD
		0.01-0.09				0.01-0.2				0.01-0.3				0.01-0.5								0.01-0.09				0.01-0.2				0.01-0.3				0.01-0.5
		BW		FIR		BW		FIR		BW		FIR		BW		FIR						BW		FIR		BW		FIR		BW		FIR		BW		FIR
		t(17)	p	t(17)	p	t(17)	p	t(17)	p	t(17)	p	t(17)	p	t(17)	p	t(17)	p					t(17)	p	t(17)	p	t(17)	p	t(17)	p	t(17)	p	t(17)	p	t(17)	p	t(17)	p
No Correction	3	-4.49997	0.000315769	0.768284	0.45286	-4.31547	0.000469094	0.810272	0.428981	-4.31363	0.000470956	0.872754	0.394958	-4.32665	0.00045795	1.05808	0.304822			No Correction	3	4.60898	0.000250227	-2.82262	0.0117329	4.3574	0.000428653	-2.86074	0.0108257	4.36141	0.000424982	-2.91747	0.00960032	4.36375	0.000422844	-3.08573	0.00670646
	4	-4.68859	0.000211259	0.775079	0.448941	-4.47914	0.000330163	0.847865	0.408292	-4.47727	0.000331481	0.954211	0.353349	-4.47948	0.000329924	1.2551	0.226423				4	4.85748	0.000147804	-2.82798	0.011601	4.62133	0.000243734	-2.89406	0.0100888	4.58695	0.000262252	-2.99061	0.00821759	4.53686	0.00029183	-3.26379	0.00457383
	5	-	-	0.783283	0.444237	-4.3802	0.000408172	0.892564	0.384552	-4.44198	0.000357508	1.04873	0.308983	-4.44627	0.000354237	1.46599	0.160902				5	-	-	-2.83454	0.0114416	4.49619	0.000318333	-2.93374	0.00927428	4.45027	0.000351211	-3.07552	0.00685461	4.40616	0.000386045	-3.45439	0.00302919
	20	-	-	1.07555	0.297158	-	-	2.04693	0.0564461	-	-	2.51434	0.0222835	-	-	1.6315	0.121169				20	-	-	-3.08074	0.00677849	-	-	-3.96231	0.00100612	-	-	-4.39177	0.000398156	-	-	-3.60403	0.00218965
	100	-	-	1.05892	0.304451	-	-	-2.98696	0.00828175	-	-	-3.0121	0.00784953	-	-	-3.00458	0.00797642				100	-	-	-3.03936	0.00740575	-	-	0.625712	0.539814	-	-	0.645454	0.52725	-	-	0.635587	0.533509
	200	-	-	-6.01901	1.38127e-05	-	-	-6.04071	1.32357e-05	-	-	-6.064	1.26441e-05	-	-	-6.09984	1.17866e-05				200	-	-	4.14574	0.000676414	-	-	4.1757	0.000634019	-	-	4.19251	0.000611429	-	-	4.22391	0.000571374
	500	-	-	-4.76813	0.000178489	-	-	-4.83405	0.000155289	-	-	-4.83403	0.000155296	-	-	-4.8357	0.000154747				500	-	-	4.38251	0.000406151	-	-	4.41234	0.000380961	-	-	4.39989	0.000391276	-	-	4.39489	0.000395498
	1000	-	-	-4.06537	0.000804818	-	-	-4.16214	0.000652862	-	-	-4.15828	0.000658336	-	-	-4.1544	0.000663876				1000	-	-	3.40319	0.00338437	-	-	3.46816	0.0029401	-	-	3.45186	0.00304582	-	-	3.44309	0.00310425
Down-sampling	3	-4.84719	0.000151044	0.660839	0.517572	-4.67777	0.00021617	0.701492	0.492488	-4.66908	0.000220198	0.761986	0.456511	-4.68136	0.000214527	0.941399	0.359687			Down-sampling	3	5.18046	7.52508e-05	-2.77725	0.0129082	4.94278	0.000123537	-2.8152	0.0119177	4.96517	0.000117869	-2.87168	0.0105782	4.96237	0.000118564	-3.03925	0.00740743
	4	-5.07751	9.32035e-05	0.66831	0.512908	-4.87827	0.000141474	0.738861	0.470071	-4.88818	0.000138554	0.841932	0.411514	-4.91709	0.000130382	1.13349	0.27274				4	5.47052	4.14526e-05	-2.77308	0.013022	5.24217	6.62301e-05	-2.83891	0.0113367	5.22104	6.91861e-05	-2.93511	0.00924736	5.18067	7.52183e-05	-3.20744	0.00516421
	5	-	-	0.676785	0.507648	-4.76986	0.000177838	0.782787	0.444521	-4.84734	0.000150996	0.934255	0.363254	-4.8675	0.000144718	1.33885	0.19825				5	-	-	-2.77325	0.0130173	5.18541	7.44817e-05	-2.87205	0.01057	5.14828	8.0445e-05	-3.01328	0.00782977	5.09404	9.00478e-05	-3.39094	0.00347523
	20	-	-	0.965762	0.347702	-	-	1.90803	0.0734229	-	-	2.36019	0.0304786	-	-	1.50013	0.151924				20	-	-	-3.02147	0.00769416	-	-	-3.89643	0.00116065	-	-	-4.32133	0.000463216	-	-	-3.5328	0.00255565
	100	-	-	0.948995	0.35592	-	-	-3.0026	0.00801016	-	-	-3.02764	0.0075934	-	-	-3.02053	0.00770954				100	-	-	-2.98729	0.0082758	-	-	0.685844	0.502058	-	-	0.708291	0.488364	-	-	0.702078	0.492132
	200	-	-	-5.98179	1.4864e-05	-	-	-5.97382	1.50995e-05	-	-	-5.99729	1.44163e-05	-	-	-6.03026	1.35105e-05				200	-	-	4.24229	0.000549168	-	-	4.30823	0.000476464	-	-	4.32573	0.000458858	-	-	4.3574	0.000428653
	500	-	-	-5.0766	9.33802e-05	-	-	-5.14488	8.10153e-05	-	-	-5.14366	8.12198e-05	-	-	-5.14262	8.13967e-05				500	-	-	4.96293	0.000118425	-	-	5.05499	9.76841e-05	-	-	5.04479	9.97867e-05	-	-	5.04583	9.95693e-05
	1000	-	-	-4.3994	0.000391688	-	-	-4.49802	0.000317092	-	-	-4.49675	0.000317954	-	-	-4.49005	0.000322541				1000	-	-	3.91158	0.00112312	-	-	4.0162	0.000895223	-	-	4.00403	0.000919152	-	-	4.0022	0.00092279
Precoloring	3	-3.8215	0.00136561	0.737147	0.471085	-3.8119	0.00139435	0.785582	0.442924	-3.81401	0.00138799	0.857659	0.403011	-3.8246	0.00135645	1.07145	0.298945			Precoloring	3	3.83507	0.00132596	-2.71781	0.0146207	3.77644	0.00150594	-2.76209	0.0133258	3.79272	0.00145364	-2.82798	0.011601	3.80208	0.00142441	-3.02342	0.00766215
	4	-4.05318	0.000826341	0.745405	0.466209	-3.97738	0.000973787	0.829364	0.418392	-3.97903	0.000970316	0.952033	0.354421	-3.98218	0.000963705	1.2991	0.211254				4	4.05534	0.000822483	-2.72479	0.0144088	4.00492	0.000917381	-2.80154	0.0122655	3.97283	0.000983439	-2.91368	0.0096778	3.93163	0.00107533	-3.23095	0.00490925
	5	-	-	0.755376	0.460362	-3.87219	0.00122332	0.881422	0.390382	-3.9456	0.00104324	1.06155	0.30329	-3.93078	0.00107732	1.5428	0.14129				5	-	-	-2.73329	0.0141549	3.91708	0.0011098	-2.8485	0.0111093	3.90447	0.00114058	-3.01315	0.00783189	3.85675	0.001265	-3.4531	0.00303763
	20	-	-	1.10905	0.282852	-	-	2.22582	0.0398446	-	-	2.75996	0.0133855	-	-	1.73278	0.101234				20	-	-	-3.04374	0.00733664	-	-	-4.06328	0.000808474	-	-	-4.55502	0.000280732	-	-	-3.62636	0.00208608
	100	-	-	1.14415	0.268417	-	-	-3.64527	0.00200217	-	-	-3.67531	0.00187573	-	-	-3.66691	0.00191026				100	-	-	-3.06877	0.00695442	-	-	1.35218	0.194034	-	-	1.37787	0.186112	-	-	1.36775	0.189201
	200	-	-	-6.79174	3.14282e-06	-	-	-6.97457	2.24056e-06	-	-	-7.0025	2.12852e-06	-	-	-7.04255	1.97793e-06				200	-	-	5.14935	8.0266e-05	-	-	5.364	5.15403e-05	-	-	5.38645	4.92222e-05	-	-	5.42402	4.558e-05
	500	-	-	-4.31338	0.000471208	-	-	-4.42698	0.000369193	-	-	-4.4284	0.000368069	-	-	-4.42924	0.000367405				500	-	-	3.83155	0.00133614	-	-	3.95883	0.00101375	-	-	3.95044	0.00103235	-	-	3.94838	0.00103697
	1000	-	-	-3.57829	0.00231546	-	-	-3.70812	0.00174677	-	-	-3.70656	0.0017527	-	-	-3.70422	0.00176163				1000	-	-	2.99725	0.00810199	-	-	3.13993	0.00597067	-	-	3.12738	0.00613374	-	-	3.11841	0.00625283
Comparison
HbO2C vs HbO2OD																				HbRC vs HbROD
		0.01-0.09				0.01-0.2				0.01-0.3				0.01-0.5								0.01-0.09				0.01-0.2				0.01-0.3				0.01-0.5
		BW		FIR		BW		FIR		BW		FIR		BW		FIR						BW		FIR		BW		FIR		BW		FIR		BW		FIR
		t(16)	p	t(16)	p	t(16)	p	t(16)	p	t(16)	p	t(16)	p	t(16)	p	t(16)	p					t(16)	p	t(16)	p	t(16)	p	t(16)	p	t(16)	p	t(16)	p	t(16)	p	t(16)	p
No Correction	3	-5.20853e-08	1	0	1	-1.98235e-09	1	0	1	1.882e-10	1	0	1	-1.41424e-10	1	-1.03608e-15	1			No Correction	3	4.75543e-08	1	-1.44089e-15	1	-2.77864e-09	1	0	1	9.50296e-11	1	-1.42002e-15	1	-1.02871e-10	1	0	1
	4	9.74594e-05	0.999923	0	1	3.21303e-06	0.999997	0	1	-1.03107e-07	1	0	1	1.85776e-09	1	1.0063e-15	1				4	-4.2009e-05	0.999967	0	1	7.5722e-06	0.999994	0	1	-5.02487e-07	1	-1.40313e-15	1	1.70235e-07	1	0	1
	5	-	-	0	1	0.00328487	0.997398	0	1	0.000634134	0.999498	0	1	-3.4032e-05	0.999973	0	1				5	-	-	-2.87295e-15	1	0.00330629	0.997381	0	1	-0.000468053	0.999629	0	1	4.84575e-05	0.999962	1.30034e-15	1
	20	-	-	0	1	-	-	0	1	-	-	-2.43488e-15	1	-	-	9.50497e-16	1				20	-	-	0	1	-	-	-1.16622e-15	1	-	-	0	1	-	-	0	1
	100	-	-	1.04839e-15	1	-	-	8.64383e-16	1	-	-	8.65922e-16	1	-	-	0	1				100	-	-	-2.78602e-15	1	-	-	0	1	-	-	1.18393e-15	1	-	-	0	1
	200	-	-	-1.33012e-15	1	-	-	0	1	-	-	1.34583e-15	1	-	-	-1.34697e-15	1				200	-	-	2.04782e-15	1	-	-	0	1	-	-	-4.20886e-15	1	-	-	0	1
	500	-	-	-2.08042e-15	1	-	-	4.20458e-15	1	-	-	0	1	-	-	0	1				500	-	-	0	1	-	-	3.90356e-15	1	-	-	-7.81442e-15	1	-	-	0	1
	1000	-	-	-3.96918e-15	1	-	-	4.00566e-15	1	-	-	0	1	-	-	0	1				1000	-	-	-3.31669e-15	1	-	-	0	1	-	-	6.70757e-15	1	-	-	3.35535e-15	1
Down-sampling	3	1.63713e-08	1	0	1	-2.66821e-09	1	0	1	5.69607e-10	1	-1.03029e-15	1	9.79324e-11	1	2.00674e-15	1			Down-sampling	3	4.65372e-08	1	0	1	-6.03724e-10	1	0	1	8.50045e-10	1	0	1	-2.28943e-10	1	-1.37286e-15	1
	4	0.000104986	0.999917	0	1	7.17902e-06	0.999994	0	1	-3.87136e-07	1	0	1	-1.29622e-09	1	0	1				4	3.06e-06	0.999998	0	1	4.20969e-06	0.999997	0	1	8.41838e-08	1	4.18005e-15	1	1.00729e-07	1	0	1
	5	-	-	0	1	0.00339227	0.997313	0	1	0.000175533	0.999861	0	1	-5.66988e-05	0.999955	0	1				5	-	-	0	1	0.000865703	0.999314	0	1	0.000190875	0.999849	0	1	2.80221e-05	0.999978	0	1
	20	-	-	0	1	-	-	1.70433e-15	1	-	-	-3.15255e-15	1	-	-	0	1				20	-	-	-2.69112e-15	1	-	-	0	1	-	-	0	1	-	-	0	1
	100	-	-	0	1	-	-	-8.37647e-16	1	-	-	0	1	-	-	-8.37908e-16	1				100	-	-	-1.38563e-15	1	-	-	1.17356e-15	1	-	-	1.17609e-15	1	-	-	0	1
	200	-	-	0	1	-	-	0	1	-	-	0	1	-	-	1.29283e-15	1				200	-	-	-2.04296e-15	1	-	-	0	1	-	-	2.09661e-15	1	-	-	0	1
	500	-	-	-4.11276e-15	1	-	-	0	1	-	-	-2.07814e-15	1	-	-	-2.07726e-15	1				500	-	-	3.87528e-15	1	-	-	3.92151e-15	1	-	-	7.83621e-15	1	-	-	0	1
	1000	-	-	0	1	-	-	3.98458e-15	1	-	-	0	1	-	-	1.99182e-15	1				1000	-	-	0	1	-	-	-3.36291e-15	1	-	-	0	1	-	-	0	1
Precoloring	3	-4.51652e-08	1	-1.2453e-15	1	-1.46797e-09	1	0	1	3.76404e-10	1	0	1	-1.51177e-10	1	-1.19527e-15	1			Precoloring	3	4.88335e-08	1	0	1	-1.9701e-09	1	-1.66418e-15	1	9.10855e-10	1	0	1	5.56372e-11	1	1.60668e-15	1
	4	0.000100895	0.99992	1.24377e-15	1	3.75051e-06	0.999997	0	1	-4.91702e-07	1	0	1	9.21859e-09	1	0	1				4	-1.40861e-05	0.999989	0	1	3.17127e-06	0.999997	0	1	-8.67719e-07	0.999999	0	1	1.46837e-07	1	3.12068e-15	1
	5	-	-	1.24192e-15	1	0.00232944	0.998155	0	1	0.000591213	0.999532	0	1	-4.57024e-05	0.999964	0	1				5	-	-	0	1	0.00273169	0.997836	0	1	-0.000290932	0.99977	0	1	2.0679e-06	0.999998	0	1
	20	-	-	0	1	-	-	-2.02421e-15	1	-	-	-1.87252e-15	1	-	-	1.09655e-15	1				20	-	-	-1.57395e-15	1	-	-	0	1	-	-	1.25564e-15	1	-	-	1.47381e-15	1
	100	-	-	1.20735e-15	1	-	-	0	1	-	-	0	1	-	-	1.99484e-15	1				100	-	-	0	1	-	-	0	1	-	-	1.37471e-15	1	-	-	2.7456e-15	1
	200	-	-	0	1	-	-	1.53084e-15	1	-	-	1.53096e-15	1	-	-	0	1				200	-	-	-2.34792e-15	1	-	-	-2.39759e-15	1	-	-	0	1	-	-	-2.39721e-15	1
	500	-	-	0	1	-	-	0	1	-	-	2.14147e-15	1	-	-	-2.14144e-15	1				500	-	-	0	1	-	-	0	1	-	-	0	1	-	-	-3.83231e-15	1
	1000	-	-	0	1	-	-	-2.0426e-15	1	-	-	0	1	-	-	0	1				1000	-	-	0	1	-	-	-3.37649e-15	1	-	-	0	1	-	-	0	1

## Sheet: Amplitude 3
BP
HbO2C																				HbRC
		0.01-0.09				0.01-0.2				0.01-0.3				0.01-0.5								0.01-0.09				0.01-0.2				0.01-0.3				0.01-0.5
		BW		FIR		BW		FIR		BW		FIR		BW		FIR						BW		FIR		BW		FIR		BW		FIR		BW		FIR
		t(17)	p	t(17)	p	t(17)	p	t(17)	p	t(17)	p	t(17)	p	t(17)	p	t(17)	p					t(17)	p	t(17)	p	t(17)	p	t(17)	p	t(17)	p	t(17)	p	t(17)	p	t(17)	p
No Correction	3	-3.14727	0.00587738	1.12643	0.275634	-3.05285	0.00719519	1.1557	0.26379	-3.03268	0.00751216	1.19925	0.246879	-3.0336	0.00749736	1.32844	0.201591			No Correction	3	2.73191	0.0141959	-2.69539	0.0153216	2.57027	0.0198628	-2.71598	0.0146769	2.57791	0.0195523	-2.74661	0.0137655	2.58791	0.0191528	-2.83747	0.0113711
	4	-3.25356	0.00467582	1.13123	0.273664	-3.136	0.00602133	1.18197	0.253489	-3.11813	0.00625663	1.25609	0.226071	-3.13248	0.00606699	1.46583	0.160948				4	2.91436	0.00966377	-2.69844	0.0152247	2.78681	0.0126515	-2.73412	0.0141303	2.75187	0.0136144	-2.78626	0.0126662	2.7111	0.0148274	-2.93378	0.00927357
	5	-	-	1.13703	0.271301	-3.10013	0.0065027	1.21319	0.241644	-3.12948	0.00610612	1.32204	0.203667	-3.14417	0.00591656	1.61288	0.125179				5	-	-	-2.70213	0.0151078	2.69691	0.0152731	-2.7557	0.0135055	2.68734	0.0155813	-2.83227	0.0114965	2.63923	0.0172216	-3.03687	0.00744528
	20	-	-	1.34385	0.19666	-	-	2.01949	0.0594886	-	-	2.34428	0.0314693	-	-	1.728	0.102108				20	-	-	-2.83641	0.0113965	-	-	-3.31317	0.00411149	-	-	-3.54496	0.00248914	-	-	-3.11809	0.00625711
	100	-	-	1.33276	0.200198	-	-	-1.51981	0.146939	-	-	-1.53753	0.142567	-	-	-1.53228	0.143852				100	-	-	-2.8138	0.0119529	-	-	-0.846968	0.408779	-	-	-0.836208	0.414638	-	-	-0.841631	0.411678
	200	-	-	-3.73203	0.0016584	-	-	-3.80024	0.00143009	-	-	-3.81752	0.00137743	-	-	-3.84277	0.00130398				200	-	-	0.916622	0.372162	-	-	0.907169	0.376997	-	-	0.915931	0.372514	-	-	0.931172	0.364801
	500	-	-	-3.33675	0.00390731	-	-	-3.38281	0.00353692	-	-	-3.38163	0.00354596	-	-	-3.38129	0.00354854				500	-	-	2.24245	0.0385555	-	-	2.26424	0.0369246	-	-	2.24973	0.0380032	-	-	2.23939	0.0387897
	1000	-	-	-2.89371	0.0100962	-	-	-2.95129	0.00893489	-	-	-2.94697	0.00901728	-	-	-2.94295	0.0090946				1000	-	-	1.83585	0.0839345	-	-	1.88088	0.0772305	-	-	1.86968	0.0788526	-	-	1.86135	0.0800773
Down-sampling	3	-3.30451	0.0041891	1.05011	0.308368	-3.23722	0.00484347	1.07842	0.295911	-3.20235	0.00522105	1.12055	0.278061	-3.20567	0.0051839	1.2455	0.229841			Down-sampling	3	3.02576	0.00762398	-2.67206	0.0160853	2.91833	0.00958268	-2.69233	0.0154199	2.92113	0.00952598	-2.72249	0.0144783	2.91767	0.00959611	-2.81202	0.011998
	4	-3.48467	0.00283676	1.05494	0.306214	-3.36864	0.00364703	1.10407	0.284947	-3.34715	0.0038205	1.17584	0.255865	-3.39557	0.00344061	1.37887	0.185809				4	3.23967	0.00481796	-2.66509	0.0163202	3.16271	0.00568564	-2.70029	0.0151657	3.12047	0.00622521	-2.75174	0.0136181	3.09543	0.00656858	-2.89743	0.010017
	5	-	-	1.06055	0.303731	-3.28032	0.00441367	1.13433	0.2724	-3.33998	0.00388016	1.23975	0.231909	-3.36442	0.00368045	1.52139	0.146544				5	-	-	-2.66167	0.0164371	3.08209	0.00675897	-2.71449	0.0147225	3.06858	0.00695727	-2.79003	0.0125661	3.02381	0.0076558	-2.99215	0.00819052
	20	-	-	1.26517	0.222877	-	-	1.91934	0.0718865	-	-	2.23271	0.0393056	-	-	1.63273	0.120909				20	-	-	-2.79143	0.0125292	-	-	-3.2583	0.00462834	-	-	-3.4843	0.00283902	-	-	-3.06269	0.00704538
	100	-	-	1.25293	0.227193	-	-	-1.53239	0.143824	-	-	-1.55002	0.139552	-	-	-1.54462	0.140849				100	-	-	-2.77418	0.0129918	-	-	-0.827011	0.419688	-	-	-0.815259	0.426199	-	-	-0.818381	0.424463
	200	-	-	-3.70411	0.00176205	-	-	-3.73304	0.00165475	-	-	-3.74998	0.00159499	-	-	-3.77261	0.00151852				200	-	-	0.88397	0.389043	-	-	0.903757	0.378753	-	-	0.912963	0.374028	-	-	0.931486	0.364643
	500	-	-	-3.50642	0.00270611	-	-	-3.55604	0.00242999	-	-	-3.55776	0.00242096	-	-	-3.55673	0.00242635				500	-	-	2.51486	0.0222599	-	-	2.59408	0.0189103	-	-	2.5889	0.0191137	-	-	2.58952	0.0190892
	1000	-	-	-3.0982	0.00652974	-	-	-3.15388	0.00579453	-	-	-3.1536	0.00579799	-	-	-3.14925	0.00585244				1000	-	-	2.15458	0.0458282	-	-	2.22032	0.0402791	-	-	2.21226	0.040925	-	-	2.21233	0.0409188
Precoloring	3	-2.67089	0.0161244	1.08721	0.29212	-2.67921	0.0158475	1.12083	0.277944	-2.67288	0.0160579	1.17087	0.257804	-2.67307	0.0160514	1.31928	0.20457			Precoloring	3	2.22345	0.0400316	-2.61902	0.0179588	2.17963	0.0436362	-2.64263	0.0171006	2.19022	0.0427388	-2.67775	0.0158957	2.20046	0.041887	-2.78194	0.0127816
	4	-2.8083	0.0120923	1.093	0.289642	-2.76328	0.0132924	1.15128	0.265553	-2.75551	0.0135111	1.23643	0.233109	-2.76895	0.0131353	1.47736	0.157866				4	2.38488	0.0289993	-2.6228	0.0178187	2.36793	0.0300073	-2.66372	0.016367	2.33371	0.0321441	-2.7235	0.0144478	2.30359	0.0341414	-2.89265	0.0101189
	5	-	-	1.09998	0.286672	-2.70674	0.014963	1.18748	0.251367	-2.74894	0.0136983	1.31251	0.206792	-2.75173	0.0136185	1.64657	0.118006				5	-	-	-2.62738	0.0176502	2.29904	0.0344532	-2.68881	0.0155334	2.29853	0.0344882	-2.7766	0.012926	2.24959	0.038014	-3.01116	0.00786525
	20	-	-	1.34804	0.195335	-	-	2.12219	0.0488132	-	-	2.49214	0.0233199	-	-	1.77825	0.093252				20	-	-	-2.79129	0.0125329	-	-	-3.33595	0.00391403	-	-	-3.59863	0.0022155	-	-	-3.1038	0.00645182
	100	-	-	1.36982	0.188566	-	-	-1.98121	0.0639803	-	-	-2.00207	0.061496	-	-	-1.996	0.0622102				100	-	-	-2.79552	0.0124219	-	-	-0.471972	0.642948	-	-	-0.459455	0.651729	-	-	-0.465398	0.647553
	200	-	-	-4.27314	0.000513848	-	-	-4.41978	0.000374932	-	-	-4.43977	0.000359205	-	-	-4.46829	0.000337918				200	-	-	1.45417	0.164114	-	-	1.54924	0.139738	-	-	1.55912	0.13739	-	-	1.57643	0.133352
	500	-	-	-3.01095	0.00786882	-	-	-3.08087	0.00677663	-	-	-3.08165	0.00676522	-	-	-3.08198	0.0067605				500	-	-	1.90624	0.0736685	-	-	1.98746	0.0632265	-	-	1.97994	0.0641342	-	-	1.97583	0.0646357
	1000	-	-	-2.55561	0.0204722	-	-	-2.63668	0.0173128	-	-	-2.63644	0.0173215	-	-	-2.63479	0.0173811				1000	-	-	1.58156	0.132175	-	-	1.66225	0.11479	-	-	1.65294	0.11669	-	-	1.64574	0.118179
HbO2OD																				HbROD
		0.01-0.09				0.01-0.2				0.01-0.3				0.01-0.5								0.01-0.09				0.01-0.2				0.01-0.3				0.01-0.5
		BW		FIR		BW		FIR		BW		FIR		BW		FIR						BW		FIR		BW		FIR		BW		FIR		BW		FIR
		t(17)	p	t(17)	p	t(17)	p	t(17)	p	t(17)	p	t(17)	p	t(17)	p	t(17)	p					t(17)	p	t(17)	p	t(17)	p	t(17)	p	t(17)	p	t(17)	p	t(17)	p	t(17)	p
No Correction	3	-3.14727	0.00587738	1.12643	0.275634	-3.05285	0.00719519	1.1557	0.26379	-3.03268	0.00751216	1.19925	0.246879	-3.0336	0.00749736	1.32844	0.201591			No Correction	3	2.73191	0.0141959	-2.69539	0.0153216	2.57027	0.0198628	-2.71598	0.0146769	2.57791	0.0195523	-2.74661	0.0137655	2.58791	0.0191528	-2.83747	0.0113711
	4	-3.25358	0.00467561	1.13123	0.273664	-3.136	0.00602129	1.18197	0.253489	-3.11813	0.00625664	1.25609	0.226071	-3.13248	0.00606699	1.46583	0.160948				4	2.91413	0.00966846	-2.69844	0.0152247	2.78682	0.0126514	-2.73412	0.0141303	2.75187	0.0136144	-2.78626	0.0126662	2.7111	0.0148274	-2.93378	0.00927357
	5	-	-	1.13703	0.271301	-3.0943	0.00658447	1.21319	0.241644	-3.12834	0.00612103	1.32204	0.203667	-3.14411	0.00591731	1.61288	0.125179				5	-	-	-2.70213	0.0151078	2.69505	0.0153325	-2.7557	0.0135055	2.68621	0.0156178	-2.83227	0.0114965	2.63919	0.0172231	-3.03687	0.00744528
	20	-	-	1.34385	0.19666	-	-	2.01949	0.0594886	-	-	2.34428	0.0314693	-	-	1.728	0.102108				20	-	-	-2.83641	0.0113965	-	-	-3.31317	0.00411149	-	-	-3.54496	0.00248914	-	-	-3.11809	0.00625711
	100	-	-	1.33276	0.200198	-	-	-1.51981	0.146939	-	-	-1.53753	0.142567	-	-	-1.53228	0.143852				100	-	-	-2.8138	0.0119529	-	-	-0.846968	0.408779	-	-	-0.836208	0.414638	-	-	-0.841631	0.411678
	200	-	-	-3.73203	0.0016584	-	-	-3.80024	0.00143009	-	-	-3.81752	0.00137743	-	-	-3.84277	0.00130398				200	-	-	0.916622	0.372162	-	-	0.907169	0.376997	-	-	0.915931	0.372514	-	-	0.931172	0.364801
	500	-	-	-3.33675	0.00390731	-	-	-3.38281	0.00353692	-	-	-3.38163	0.00354596	-	-	-3.38129	0.00354854				500	-	-	2.24245	0.0385555	-	-	2.26424	0.0369246	-	-	2.24973	0.0380032	-	-	2.23939	0.0387897
	1000	-	-	-2.89371	0.0100962	-	-	-2.95129	0.00893489	-	-	-2.94697	0.00901728	-	-	-2.94295	0.0090946				1000	-	-	1.83585	0.0839345	-	-	1.88088	0.0772305	-	-	1.86968	0.0788526	-	-	1.86135	0.0800773
Down-sampling	3	-3.30451	0.0041891	1.05011	0.308368	-3.23722	0.00484347	1.07842	0.295911	-3.20235	0.00522105	1.12055	0.278061	-3.20567	0.0051839	1.2455	0.229841			Down-sampling	3	3.02576	0.00762398	-2.67206	0.0160853	2.91833	0.00958268	-2.69233	0.0154199	2.92113	0.00952598	-2.72249	0.0144783	2.91767	0.00959611	-2.81202	0.011998
	4	-3.4847	0.00283658	1.05494	0.306214	-3.36863	0.00364706	1.10407	0.284947	-3.34714	0.0038205	1.17584	0.255865	-3.39557	0.00344061	1.37887	0.185809				4	3.23971	0.00481752	-2.66509	0.0163202	3.16271	0.00568568	-2.70029	0.0151657	3.12047	0.00622523	-2.75174	0.0136181	3.09543	0.00656858	-2.89743	0.010017
	5	-	-	1.06055	0.303731	-3.27836	0.00443232	1.13433	0.2724	-3.33902	0.00388816	1.23975	0.231909	-3.36444	0.00368027	1.52139	0.146544				5	-	-	-2.66167	0.0164371	3.0803	0.00678492	-2.71449	0.0147225	3.06854	0.00695774	-2.79003	0.0125661	3.02381	0.00765581	-2.99215	0.00819052
	20	-	-	1.26517	0.222877	-	-	1.91934	0.0718865	-	-	2.23271	0.0393056	-	-	1.63273	0.120909				20	-	-	-2.79143	0.0125292	-	-	-3.2583	0.00462834	-	-	-3.4843	0.00283902	-	-	-3.06269	0.00704538
	100	-	-	1.25293	0.227193	-	-	-1.53239	0.143824	-	-	-1.55002	0.139552	-	-	-1.54462	0.140849				100	-	-	-2.77418	0.0129918	-	-	-0.827011	0.419688	-	-	-0.815259	0.426199	-	-	-0.818381	0.424463
	200	-	-	-3.70411	0.00176205	-	-	-3.73304	0.00165475	-	-	-3.74998	0.00159499	-	-	-3.77261	0.00151852				200	-	-	0.88397	0.389043	-	-	0.903757	0.378753	-	-	0.912963	0.374028	-	-	0.931486	0.364643
	500	-	-	-3.50642	0.00270611	-	-	-3.55604	0.00242999	-	-	-3.55776	0.00242096	-	-	-3.55673	0.00242635				500	-	-	2.51486	0.0222599	-	-	2.59408	0.0189103	-	-	2.5889	0.0191137	-	-	2.58952	0.0190892
	1000	-	-	-3.0982	0.00652974	-	-	-3.15388	0.00579453	-	-	-3.1536	0.00579799	-	-	-3.14925	0.00585244				1000	-	-	2.15458	0.0458282	-	-	2.22032	0.0402791	-	-	2.21226	0.040925	-	-	2.21233	0.0409188
Precoloring	3	-2.67089	0.0161244	1.08721	0.29212	-2.67921	0.0158475	1.12083	0.277944	-2.67288	0.0160579	1.17087	0.257804	-2.67307	0.0160514	1.31928	0.20457			Precoloring	3	2.22345	0.0400316	-2.61902	0.0179588	2.17963	0.0436362	-2.64263	0.0171006	2.19022	0.0427388	-2.67775	0.0158957	2.20046	0.041887	-2.78194	0.0127816
	4	-2.80825	0.0120935	1.093	0.289642	-2.76329	0.0132924	1.15128	0.265553	-2.75551	0.0135111	1.23643	0.233109	-2.76895	0.0131353	1.47736	0.157866				4	2.38466	0.0290122	-2.6228	0.0178187	2.36794	0.0300071	-2.66372	0.016367	2.33371	0.0321441	-2.7235	0.0144478	2.30359	0.0341414	-2.89265	0.0101189
	5	-	-	1.09998	0.286672	-2.69881	0.0152129	1.18748	0.251367	-2.74855	0.0137097	1.31251	0.206792	-2.75171	0.0136192	1.64657	0.118006				5	-	-	-2.62738	0.0176502	2.29647	0.03463	-2.68881	0.0155334	2.29816	0.0345138	-2.7766	0.012926	2.24957	0.0380154	-3.01116	0.00786525
	20	-	-	1.34804	0.195335	-	-	2.12219	0.0488132	-	-	2.49214	0.0233199	-	-	1.77825	0.093252				20	-	-	-2.79129	0.0125329	-	-	-3.33595	0.00391403	-	-	-3.59863	0.0022155	-	-	-3.1038	0.00645182
	100	-	-	1.36982	0.188566	-	-	-1.98121	0.0639803	-	-	-2.00207	0.061496	-	-	-1.996	0.0622102				100	-	-	-2.79552	0.0124219	-	-	-0.471972	0.642948	-	-	-0.459455	0.651729	-	-	-0.465398	0.647553
	200	-	-	-4.27314	0.000513848	-	-	-4.41978	0.000374932	-	-	-4.43977	0.000359205	-	-	-4.46829	0.000337918				200	-	-	1.45417	0.164114	-	-	1.54924	0.139738	-	-	1.55912	0.13739	-	-	1.57643	0.133352
	500	-	-	-3.01095	0.00786882	-	-	-3.08087	0.00677663	-	-	-3.08165	0.00676522	-	-	-3.08198	0.0067605				500	-	-	1.90624	0.0736685	-	-	1.98746	0.0632265	-	-	1.97994	0.0641342	-	-	1.97583	0.0646357
	1000	-	-	-2.55561	0.0204722	-	-	-2.63668	0.0173128	-	-	-2.63644	0.0173215	-	-	-2.63479	0.0173811				1000	-	-	1.58156	0.132175	-	-	1.66225	0.11479	-	-	1.65294	0.11669	-	-	1.64574	0.118179
Comparison
HbO2C vs HbO2OD																				HbRC vs HbROD
		0.01-0.09				0.01-0.2				0.01-0.3				0.01-0.5								0.01-0.09				0.01-0.2				0.01-0.3				0.01-0.5
		BW		FIR		BW		FIR		BW		FIR		BW		FIR						BW		FIR		BW		FIR		BW		FIR		BW		FIR
		t(16)	p	t(16)	p	t(16)	p	t(16)	p	t(16)	p	t(16)	p	t(16)	p	t(16)	p					t(16)	p	t(16)	p	t(16)	p	t(16)	p	t(16)	p	t(16)	p	t(16)	p	t(16)	p
No Correction	3	2.00292e-08	1	0	1	-4.74181e-09	1	-6.23414e-16	1	-1.08047e-09	1	-1.23596e-15	1	-2.26883e-11	1	0	1			No Correction	3	3.20227e-08	1	6.61419e-16	1	6.2077e-09	1	-6.57569e-16	1	-2.48042e-10	1	-6.51839e-16	1	6.35453e-10	1	0	1
	4	2.26881e-05	0.999982	0	1	4.80462e-06	0.999996	0	1	-5.92924e-07	1	-1.22139e-15	1	-1.31682e-08	1	0	1				4	7.25347e-05	0.999943	1.32111e-15	1	1.9097e-06	0.999998	-6.53885e-16	1	-3.51546e-07	1	6.44139e-16	1	-1.1815e-07	1	-6.16565e-16	1
	5	-	-	-6.25302e-16	1	-0.00756479	0.994008	0	1	-0.000923321	0.999269	-1.80674e-15	1	-1.55742e-05	0.999988	-1.13203e-15	1				5	-	-	0	1	-0.00122768	0.999028	1.29901e-15	1	0.000433714	0.999656	-6.35202e-16	1	4.65099e-05	0.999963	-1.19399e-15	1
	20	-	-	0	1	-	-	1.01834e-15	1	-	-	9.42318e-16	1	-	-	-5.52123e-16	1				20	-	-	-6.22715e-16	1	-	-	-1.07243e-15	1	-	-	-9.9297e-16	1	-	-	0	1
	100	-	-	0	1	-	-	0	1	-	-	1.01063e-15	1	-	-	-1.00915e-15	1				100	-	-	-6.40315e-16	1	-	-	0	1	-	-	0	1	-	-	1.0771e-15	1
	200	-	-	0	1	-	-	-7.92332e-16	1	-	-	7.92378e-16	1	-	-	-7.93218e-16	1				200	-	-	-8.69733e-16	1	-	-	-8.92142e-16	1	-	-	0	1	-	-	0	1
	500	-	-	0	1	-	-	4.47354e-15	1	-	-	0	1	-	-	0	1				500	-	-	0	1	-	-	-1.99038e-15	1	-	-	1.9938e-15	1	-	-	1.99691e-15	1
	1000	-	-	0	1	-	-	-2.10845e-15	1	-	-	0	1	-	-	0	1				1000	-	-	0	1	-	-	0	1	-	-	-1.73084e-15	1	-	-	0	1
Down-sampling	3	3.83307e-09	1	6.06709e-16	1	-2.76943e-09	1	0	1	1.55407e-10	1	5.97909e-16	1	1.24137e-10	1	-5.82297e-16	1			Down-sampling	3	1.546e-08	1	6.47755e-16	1	5.85141e-09	1	6.43979e-16	1	4.61209e-10	1	0	1	4.4456e-10	1	-6.21688e-16	1
	4	8.81416e-05	0.99993	-6.0636e-16	1	3.23611e-06	0.999997	0	1	-2.88293e-07	1	-1.18253e-15	1	1.06237e-08	1	5.65909e-16	1				4	-9.56685e-05	0.999924	0	1	2.30488e-06	0.999998	-6.40829e-16	1	-2.46141e-08	1	0	1	-9.58793e-08	1	1.20839e-15	1
	5	-	-	1.2114e-15	1	-0.00445998	0.996468	0	1	-0.00112737	0.999107	1.16668e-15	1	4.80725e-05	0.999962	0	1				5	-	-	0	1	-0.00149674	0.998815	0	1	-9.02653e-05	0.999929	0	1	2.67144e-05	0.999979	5.85248e-16	1
	20	-	-	0	1	-	-	0	1	-	-	0	1	-	-	5.35009e-16	1				20	-	-	1.22208e-15	1	-	-	0	1	-	-	0	1	-	-	0	1
	100	-	-	-5.90472e-16	1	-	-	0	1	-	-	0	1	-	-	9.75598e-16	1				100	-	-	1.25764e-15	1	-	-	0	1	-	-	0	1	-	-	0	1
	200	-	-	0	1	-	-	0	1	-	-	-7.58576e-16	1	-	-	7.59212e-16	1				200	-	-	-2.55698e-15	1	-	-	0	1	-	-	8.73399e-16	1	-	-	0	1
	500	-	-	2.20668e-15	1	-	-	0	1	-	-	0	1	-	-	0	1				500	-	-	0	1	-	-	3.98612e-15	1	-	-	1.99202e-15	1	-	-	-1.99096e-15	1
	1000	-	-	-4.16803e-15	1	-	-	2.10569e-15	1	-	-	0	1	-	-	0	1				1000	-	-	0	1	-	-	0	1	-	-	-3.51388e-15	1	-	-	0	1
Precoloring	3	3.21865e-08	1	-7.20423e-16	1	-3.04487e-09	1	0	1	8.9793e-11	1	0	1	-4.70995e-11	1	6.91478e-16	1			Precoloring	3	-3.07045e-08	1	7.58553e-16	1	5.47298e-09	1	7.54138e-16	1	3.82683e-10	1	-1.49513e-15	1	4.78961e-10	1	0	1
	4	-2.69113e-05	0.999979	0	1	2.04582e-06	0.999998	7.12247e-16	1	-1.92719e-07	1	0	1	8.85006e-09	1	-6.71591e-16	1				4	8.18095e-05	0.999935	-1.51515e-15	1	5.91773e-07	1	0	1	-2.58925e-07	1	0	1	-7.41318e-08	1	0	1
	5	-	-	0	1	-0.00712394	0.994358	1.41504e-15	1	-0.000310769	0.999754	0	1	4.49306e-06	0.999996	6.50303e-16	1				5	-	-	7.56397e-16	1	0.000111999	0.999911	0	1	-2.81668e-06	0.999998	7.2851e-16	1	1.89726e-05	0.999985	-6.84686e-16	1
	20	-	-	0	1	-	-	0	1	-	-	0	1	-	-	6.34339e-16	1				20	-	-	-1.42912e-15	1	-	-	-6.15217e-16	1	-	-	5.69537e-16	1	-	-	0	1
	100	-	-	1.39508e-15	1	-	-	-1.1556e-15	1	-	-	0	1	-	-	0	1				100	-	-	-7.3415e-16	1	-	-	0	1	-	-	0	1	-	-	0	1
	200	-	-	8.75787e-16	1	-	-	2.66375e-15	1	-	-	-8.88212e-16	1	-	-	-8.89068e-16	1				200	-	-	0	1	-	-	-1.01149e-15	1	-	-	0	1	-	-	0	1
	500	-	-	0	1	-	-	2.26339e-15	1	-	-	2.2634e-15	1	-	-	0	1				500	-	-	-1.86621e-15	1	-	-	1.89019e-15	1	-	-	0	1	-	-	-1.89466e-15	1
	1000	-	-	0	1	-	-	-2.13347e-15	1	-	-	-4.26717e-15	1	-	-	0	1				1000	-	-	1.67946e-15	1	-	-	3.40185e-15	1	-	-	0	1	-	-	0	1
